# Supplementary material for: RNA-Seq-Based Transcriptome Analysis of Nitric Oxide Scavenging Response in Neurospora crassa
Source: J Fungi (Basel). 2023 Oct 2;9(10):985. doi: 10.3390/jof9100985 (PMC10607626; doi:10.3390/jof9100985)
Supplement: Supplementary file 1 [file jof-09-00985-s001.zip › 20230917 Supplementary tables R1.xlsx]

## Sheet: Table S1
Supplementary Table S1. Primer sequences for 20 genes and 18s rRNA (reference gene)
Genes	Primer Sequences
NCU00684	Forward-5'-CGCTGGCTTACTCCTTCATC-3'
	Reverse-5'-TGAGCTTGTATGGGTCACCA-3'
NCU01063	Forward-5'-TCTCCGCCTTTGACTACCAC-3'
	Reverse-5'-AGTCGTTGAGCTGGTTGCTT-3'
NCU01193	Forward-5'-GCTCTGGCTCGTTACGGTAG-3'
	Reverse-5'-TGACATAGGTACCGCCAACA-3'
NCU01640	Forward-5'-CCTTTCCTCACTTGGCTCAG-3'
	Reverse-5'-TAGGCACTGCATTCGAGTTG-3'
NCU01748	Forward-5'-CTTCGTCTTCGTCCTCATCC-3'
	Reverse-5'-GCTGTAGGAACCGCTTTGTC-3'
NCU01898	Forward-5'-AACCAAGTCTCGAAGGCTCA-3'
	Reverse-5'-GGGATGTTTGTTGCAGTCCT-3'
NCU02175	Forward-5'-CTGGAACAACTGCTCGACAA-3'
	Reverse-5'-TCACTGCGCGTGTAAATAGC-3'
NCU02363	Forward-5'-TCCTAGCCGGTACATTCCAC-3'
	Reverse-5'-CATCAGACTCGCCTCAAACA-3'
NCU02400	Forward-5'-CGACAAGTGGGACACATCAC-3'
	Reverse-5'-AGGTTGGGCTCCTTGAGAAT-3'
NCU03500	Forward-5'-GTCGTCCCGGGTATCTTCTT-3'
	Reverse-5'-CAGTGTGTGGCTCCTTCTCA-3'
NCU17268	Forward-5'-GCCATAAAGGCGAAGTGAAG-3'
	Reverse-5'-GAACTTGCATGGTGGTGTTG-3'
NCU05764	Forward-5'-CAACATCCGCAATGTCTACG-3'
	Reverse-5'-GCTGCTGTTTCTCCAAGTCC-3'
NCU01212	Forward-5'-CCTCTTTCTCAACCCATCCA-3'
	Reverse-5'-ATTCACGAACGGACTTGGTC-3'
NCU16445	Forward-5'-GCGCAAACTATTACGGTTCG-3'
	Reverse-5'-CCTCGCTGAACTTTGAGAGC-3'
NCU10852	Forward-5'-TCAAGCTCAACGACACCAAG-3'
	Reverse-5'-GCTGCTTATCGACGAACCTC-3'
NCU10809	Forward-5'-ACTCCAACAAACCAGCAACC-3'
	Reverse-5'-GAAGTGCGTCGAATCTGACA-3'
NCU09873	Forward-5'-AAATGCCCTCGACTACAACG-3'
	Reverse-5'-GACTGAAGGGTTGGCGATAA-3'
NCU09522	Forward-5'-AACTGAGGCGCACAAGTTCT-3'
	Reverse-5'-CTCTGCAACAGGACGATGAA-3'
NCU08720	Forward-5'-GGCCAGCTTCAAGTACAACC-3'
	Reverse-5'-AGATCTCGTTACCGCCAATG-3'
NCU08229	Forward-5'-TACGACCCCTCACATCATCA-3'
	Reverse-5'-TCCTTGACGCACATCTTGTC-3'
18s rRNA	Forward-5'-TTAAAAACCAATGCCCTTCG-3'
	Reverse-5'-GAGCCCTAACCCTCCGTTAC-3'

## Sheet: Table S2
Supplementary Table S2. 424 differentially expressed genes (DEGs) between control (no cPTIO) and cPTIO treated groups. Samples from two replicate experiments (replicate 1: 1 control vs. 4 cPTIO treat, replicate 2: 2 control vs. 5 cPTIO treat) are used in RNA sequencing.
																			g
Feature_GID	Feature_TID	Type	Entrez_Gene_ID	Gene_Symbol	Gene_Synonym	Protein_ID	Product	treat/control.fc	treat/control.baseMean	treat/control.lfcSE	treat/control.stat	treat/control.raw.pval	treat/control.bh.pval	treat.mean	control.mean	N_1	N_2-control	N_4	N_5-treat	1_Read_Count	2-control_Read_Count	4_Read_Count	5-treat_Read_Count	1_FPKM	2-control_FPKM	4_FPKM	5-treat_FPKM	1_TPM	2-control_TPM	4_TPM	5-treat_TPM
gene-NCU00166	rna-XM_951586.3	protein_coding	3872826	.	.	XP_956679.3	isochorismatase domain-containing protein 2A	2.26699	850.703	0.211179	5.59137	2.25288e-08	5.25278e-07	10.2037	9.02826	9.26765	9.4664	9.88763	9.95804	534	443	1399	1118	5.74441	6.96802	13.7265	13.0494	11.4722	13.8203	27.2119	26.2114
gene-NCU00180	rna-XM_951310.3	protein_coding	3872543	.	.	XP_956403.2	hypothetical protein	-2.50164	3722.8	0.176961	-7.4755	7.69124e-14	4.59129e-12	11.0539	12.3771	12.1432	12.0091	11.4963	11.3489	7062	3549	2960	1697	27.5257	20.232	10.5134	7.17628	54.9718	40.1279	20.8421	14.4145
gene-NCU00229	rna-XM_952607.2	protein_coding	3873902	.	.	XP_957700.2	hypothetical protein	-2.58833	42.3485	0.565683	-2.42543	0.0152903	0.0625965	4.55117	5.9367	5.47161	5.50481	5.24619	5.17109	71	47	35	17	1.16037	1.10236	0.508464	0.293775	2.31738	2.18641	1.00799	0.590084
gene-NCU00247	rna-XM_952625.2	protein_coding	3873880	.	.	XP_957718.1	hypothetical protein	-2.30891	1749.46	0.193005	-6.25481	3.98003e-10	1.3035e-08	10.0458	11.2538	11.0434	10.8985	10.4691	10.2976	3267	1614	1499	824	42.7447	30.8762	17.8802	11.6946	85.3658	61.2395	35.4462	23.4901
gene-NCU00289	rna-XM_011395505.1,rna-XM_011395506.1	protein_coding	3873851	tah-1	.	XP_011393808.1; XP_011393807.1	TAH-1, variant	-2.92094	12676.2	0.146322	-10.5687	4.16303e-26	1.20828e-23	12.6587	14.205	13.8506	13.8849	13.0703	13.1271	22634	14050	7681	6123	83.4408	75.7577	25.7914	24.4784	166.64	150.257	51.1296	49.1679
gene-NCU00317	rna-XM_011395509.1,rna-XM_011395510.1	protein_coding	3873926	.	.	XP_011393812.1; XP_011393811.1	calpain-like protease palB/rim-13, variant	-2.35365	1052.48	0.184076	-6.70867	1.9641e-11	7.79802e-10	9.29252	10.5293	10.1783	10.2985	9.66866	9.63913	1666	1162	801	553	6.22967	6.38443	2.72253	2.26032	12.4413	12.6628	5.39721	4.54014
gene-NCU00322	rna-XM_952700.3	protein_coding	3873931	.	.	XP_957793.2	hypothetical protein	-2.48884	17668.5	0.185422	-7.09447	1.29845e-12	6.38745e-11	13.3061	14.6216	14.1898	14.4434	13.5969	13.7327	25997	21260	11265	10148	297.088	355.348	117.333	125.826	593.317	704.793	232.603	252.737
gene-NCU00373	rna-XM_952166.3	protein_coding	3873422	.	.	XP_957259.1	hypothetical protein	-2.29262	32911.6	0.16198	-7.38979	1.47066e-13	7.93497e-12	14.2871	15.4841	15.141	15.2827	14.5583	14.6669	51131	36354	22802	19617	166.16	172.797	67.5385	69.168	331.839	342.723	133.89	138.933
gene-NCU00399	rna-XM_952192.3	protein_coding	3873407	.	.	XP_957285.1	cell wall protein PhiA	-4.22668	67490	0.195057	-10.6611	1.54726e-26	5.00896e-24	14.6565	16.736	16.1225	16.4466	15.2017	15.3284	108006	94772	28631	25942	684.488	878.49	165.385	178.385	1367	1742.38	327.864	358.308
gene-NCU00451	rna-XM_951677.3	protein_coding	3872917	.	.	XP_956770.1	hypothetical protein	-2.19716	4815.84	0.155481	-7.30406	2.79219e-13	1.46301e-11	11.5571	12.6923	12.4889	12.3755	11.8685	11.8732	8688	4474	3739	2737	57.0973	43.0005	22.3955	19.5106	114.029	85.2866	44.3975	39.1895
gene-NCU00486	rna-XM_951078.3	protein_coding	3872318	.	.	XP_956171.2	hypothetical protein	-2.36001	11715.6	0.146399	-8.46172	2.63453e-17	2.54883e-15	12.7677	14.0065	13.7	13.7574	13.0887	13.1325	19423	12422	8386	6529	58.3453	54.578	22.9605	21.2797	116.522	108.249	45.5176	42.743
gene-NCU00558	rna-XM_959626.2	protein_coding	3880868	.	.	XP_964719.2	hypothetical protein	-2.78899	2877.13	0.207108	-7.14478	9.01418e-13	4.51621e-11	10.5685	12.0484	11.8506	11.555	11.0657	10.9023	6137	2520	2145	1190	37.8354	22.7197	12.0532	7.96061	75.5614	45.062	23.8946	15.9899
gene-NCU00627	rna-XM_960674.3	protein_coding	3881964	.	.	XP_965767.1	hypothetical protein	-2.05692	57274.7	0.139628	-7.45184	9.20454e-14	5.27038e-12	15.1935	16.234	15.9979	15.9984	15.4653	15.4861	94353	56162	45919	34460	291.86	254.097	129.464	115.658	582.875	503.972	256.652	232.314
gene-NCU00648	rna-XM_960695.3	protein_coding	3881985	.	.	XP_965788.2	choline transporter	4.34382	247.976	0.271662	7.8	6.19091e-15	4.41601e-13	8.65565	6.53402	7.34496	7.34404	8.15427	8.17383	116	66	494	371	0.735307	0.61299	2.86431	2.55892	1.46849	1.2158	5.67828	5.13992
gene-NCU00684	rna-XM_011394509.1,rna-XM_011394510.1	protein_coding	3881886	.	.	XP_011392812.1; XP_011392811.1	endonuclease/Exonuclease/phosphatase, variant	-2.92187	7114.71	0.190803	-8.10727	5.17698e-16	4.40148e-14	11.8249	13.372	13.1424	12.9016	12.3396	12.1768	14902	6580	5116	2849	74.6332	48.0584	23.1403	15.4691	149.05	95.3183	45.8739	31.0717
gene-NCU00694	rna-XM_960741.2	protein_coding	3881896	.	.	XP_965834.1	hypothetical protein	-2.34391	25916.6	0.144693	-8.49324	2.0096e-17	1.96683e-15	13.9201	15.149	14.9126	14.8343	14.2679	14.25	46675	25165	19570	13837	166.902	131.617	63.7833	53.6857	333.321	261.047	126.446	107.835
gene-NCU00708	rna-XM_959449.2	protein_coding	3880693	.	.	XP_964542.1	hypothetical protein	-3.37537	22.8096	0.757941	-2.31554	0.0205833	0.0784999	3.39131	5.13449	4.57815	4.55634	4.31895	4.3601	44	25	11	11	0.821813	0.682657	0.17347	0.212528	1.64125	1.35397	0.343891	0.42689
gene-NCU00709	rna-XM_959450.3	protein_coding	3880694	gh3-8	.	XP_964543.3	beta-xylosidase	2.05143	361.321	0.23251	4.45844	8.25598e-06	0.000104812	8.92546	7.88524	8.2421	8.18938	8.65256	8.67253	305	163	596	447	1.42098	1.11163	2.53429	2.25928	2.83785	2.20478	5.02405	4.53806
gene-NCU00759	rna-XM_011394523.1,rna-XM_011394524.1	protein_coding	3880311	.	.	XP_011392826.1; XP_011392825.1	hypothetical protein, uncharacterized protein	-2.11349	9720.16	0.156057	-6.91817	4.57514e-12	2.05038e-10	12.6082	13.6879	13.4939	13.3868	12.9419	12.8616	17258	8959	8255	5303	58.936	44.3223	25.3499	19.505	117.702	87.9082	50.2543	39.1781
gene-NCU00798	rna-XM_959861.2	protein_coding	3881103	.	.	XP_964954.1	hypothetical protein	-2.54503	61.854	0.468976	-2.87367	0.00405727	0.021478	5.12895	6.47112	6.05714	6.05419	5.68824	5.75031	108	65	39	35	0.817846	0.721482	0.268175	0.288027	1.63332	1.43098	0.531637	0.578539
gene-NCU00821	rna-XM_959271.3	protein_coding	3880507	.	.	XP_964364.3	sugar transporter	2.32532	14428.2	0.151655	8.02759	9.94028e-16	7.89315e-14	14.3005	13.0831	13.4018	13.4353	13.9663	14.0846	10351	6485	23256	19626	49.9906	45.8098	102.376	102.848	99.8365	90.8585	202.953	206.582
gene-NCU00829	rna-XM_959279.3	protein_coding	3880515	.	.	XP_964372.3	ferric reductase	2.41867	4128.74	0.159947	7.96648	1.63256e-15	1.2492e-13	12.5125	11.2375	11.637	11.5521	12.2667	12.1824	3158	1639	7661	5009	15.2643	11.5849	33.7482	26.2701	30.4844	22.9774	66.9035	52.7669
gene-NCU00830	rna-XM_959280.3	protein_coding	3880516	tcu-1	.	XP_964373.3	ctr copper transporter	2.8082	4862.06	0.150862	9.87421	5.38538e-23	1.0073e-20	12.8077	11.3187	11.7223	11.7669	12.5021	12.4571	3016	1927	9176	6310	20.7454	19.3804	57.5277	47.0916	41.4308	38.4388	114.045	94.5894
gene-NCU00835	rna-XM_958608.2	protein_coding	3879850	.	.	XP_963701.1	hypothetical protein	-2.24049	5983.31	0.163304	-7.12666	1.02836e-12	5.12171e-11	11.8506	13.0143	12.8262	12.6665	12.1983	12.1432	11154	5418	4797	3199	58.8857	41.8338	23.0789	18.321	117.601	82.9725	45.7523	36.8001
gene-NCU00855	rna-XM_959678.2	protein_coding	3880957	.	.	XP_964771.1	hypothetical protein	-2.86672	254.848	0.269435	-5.6392	1.70837e-08	4.08505e-07	7.04314	8.56152	8.12547	8.23006	7.53027	7.60963	426	297	151	129	7.6006	7.75149	2.45222	2.49628	15.1792	15.3742	4.86135	5.0141
gene-NCU00869	rna-XM_959692.3	protein_coding	3880946	.	.	XP_964785.1	hypothetical protein	-2.04308	3608.51	0.153716	-6.70552	2.0069e-11	7.93055e-10	11.2115	12.2425	12.0204	11.9898	11.5235	11.4668	6049	3461	3083	2052	22.3896	18.7354	10.4006	8.24025	44.7145	37.1595	20.6184	16.5516
gene-NCU00899	rna-XM_958723.2	protein_coding	3879965	.	.	XP_963816.1	hypothetical protein	-2.03924	31260.3	0.140122	-7.3367	2.18923e-13	1.16625e-11	14.3283	15.3564	15.1327	15.113	14.6044	14.6098	52013	30173	25509	18699	203.722	172.856	91.0666	79.4646	406.855	342.84	180.533	159.615
gene-NCU00900	rna-XM_958724.2	protein_coding	3879966	.	.	XP_963817.2	hypothetical protein	-2.50364	7417.09	0.16624	-7.96453	1.65856e-15	1.25767e-13	12.0477	13.3718	13.145	13.0003	12.4689	12.3614	14153	7024	5721	3506	64.1965	46.5979	23.6502	17.2553	128.207	92.4215	46.8849	34.6594
gene-NCU00929	rna-XM_959662.3	protein_coding	3880908	.	.	XP_964755.2	hypothetical protein	-2.38856	1517.42	0.179052	-7.01553	2.29078e-12	1.08935e-10	9.80731	11.0626	10.8489	10.6912	10.1837	10.1515	2883	1401	1146	789	6.71903	4.77448	2.43464	1.99385	13.4186	9.46962	4.8265	4.00491
gene-NCU00941	rna-XM_959674.2	protein_coding	3880891	.	.	XP_964767.2	hypothetical protein	-2.02152	731.487	0.189109	-5.3696	7.89107e-08	1.64812e-06	8.91919	9.93497	9.68902	9.68935	9.22408	9.21122	1197	714	610	433	2.77447	2.41888	1.28844	1.08811	5.54092	4.79757	2.55423	2.1856
gene-NCU00984	rna-XM_011394574.1,rna-XM_011394575.1	protein_coding	3881285	.	.	XP_011392877.1; XP_011392876.1	von Willebrand domain-containing protein, variant	-2.5364	3798.88	0.151618	-8.85635	8.26794e-19	9.27883e-17	11.0691	12.4119	12.1331	12.0893	11.462	11.4369	6855	3861	2730	1905	24.0738	19.8928	8.79671	7.28326	48.078	39.4552	17.4388	14.6293
gene-NCU00990	rna-XM_958807.3	protein_coding	3880049	.	.	XP_963900.3	hypothetical protein	3.28491	68.8697	0.466957	3.67455	0.000238272	0.00202375	6.71665	5.02521	5.73306	5.85812	6.24842	6.21931	31	29	134	93	0.246442	0.336076	0.986881	0.815477	0.492172	0.666568	1.95642	1.63799
gene-NCU01056	rna-XM_956575.2	protein_coding	3877859	.	.	XP_961668.2	hypothetical protein	-2.48964	3425.84	0.174077	-7.55949	4.0464e-14	2.48603e-12	10.9392	12.2551	12.0377	11.8706	11.358	11.2578	6614	3187	2642	1634	66.4018	46.7949	24.1779	17.8019	132.612	92.8123	47.9309	35.7574
gene-NCU01057	rna-XM_011396157.1,rna-XM_011396158.1	protein_coding	3877860	.	.	XP_011394460.1; XP_011394459.1	taurine catabolism dioxygenase TauD, variant	2.07878	4751.35	0.149336	7.06955	1.55434e-12	7.47595e-11	12.6475	11.5918	11.8767	11.888	12.3807	12.4309	3748	2267	7731	5996	23.8308	21.3356	44.965	41.3466	47.5927	42.3168	89.1398	83.0499
gene-NCU01063	rna-XM_956582.2	protein_coding	3877866	.	.	XP_961675.1	hypothetical protein	-3.96413	16401.3	0.141982	-13.9948	1.67762e-44	2.35342e-41	12.69	14.677	14.244	14.2761	13.2813	13.277	31454	19451	8259	5959	341.972	309.315	81.8374	70.2866	682.954	613.49	162.237	141.18
gene-NCU01070	rna-XM_956589.2	protein_coding	3877758	.	.	XP_961682.2	hypothetical protein	-2.49456	1401.77	0.171675	-7.68185	1.5681e-14	1.02316e-12	9.64762	10.9668	10.6911	10.6378	10.0597	10.0027	2533	1409	1047	691	30.5347	24.8366	11.4975	9.0307	60.9811	49.2606	22.793	18.1393
gene-NCU01077	rna-XM_956596.2	protein_coding	3877765	.	.	XP_961689.2	hypothetical protein	-2.28738	223.805	0.327826	-3.64126	0.000271311	0.00226102	7.08636	8.28408	8.0655	7.8439	7.60878	7.34834	444	190	216	89	4.32361	2.6957	1.91544	0.939318	8.63472	5.34662	3.79722	1.88674
gene-NCU01093	rna-XM_956612.2	protein_coding	3877792	.	.	XP_961705.1	Ser/Thr protein phosphatase	10.5636	12.2904	1.19267	2.85163	0.00434962	NA	4.48487	1.13059	3.43135	3.45481	3.59115	3.70327	2	2	20	26	0.009522	0.019678	0.152963	0.242661	0.019017	0.039029	0.303238	0.487415
gene-NCU01106	rna-XM_956625.2	protein_coding	3877778	.	.	XP_961718.1	L-amino acid oxidase	-3.18744	917.24	0.18268	-9.1548	5.44602e-20	7.05218e-18	8.77436	10.4477	10.0523	10.0898	9.29937	9.28404	1667	1043	554	390	7.2805	6.66237	2.20356	1.8471	14.5399	13.214	4.3684	3.71013
gene-NCU01124	rna-XM_011396165.1,rna-XM_011396166.1	protein_coding	3877185	.	.	XP_011394467.1; XP_011394468.1	uncharacterized protein, hypothetical protein	-2.16054	1501.72	0.207944	-5.34468	9.0576e-08	1.86857e-06	9.89291	11.0033	10.8756	10.5822	10.2462	10.1563	2988	1213	1270	798	21.9396	13.0007	8.50329	6.34645	43.8158	25.7854	16.8572	12.7477
gene-NCU01138	rna-XM_955952.2	protein_coding	3877167	.	.	XP_961045.1	CipA protein	2.29033	273.791	0.254473	4.69816	2.62515e-06	3.77708e-05	8.57513	7.37668	7.797	7.76275	8.27545	8.26417	212	116	478	343	1.87574	1.50182	3.86173	3.30046	3.74605	2.97868	7.6556	6.6294
gene-NCU01193	rna-XM_956466.3	protein_coding	3877682	.	.	XP_961559.3	hypothetical protein	-3.18518	17624.3	0.141477	-11.8137	3.31511e-32	1.55018e-29	13.04	14.7114	14.3433	14.3594	13.5289	13.5133	32522	19736	10623	7525	78.4408	69.6268	23.3525	19.6932	156.655	138.097	46.2946	39.5564
gene-NCU01212	rna-XM_956485.3	protein_coding	3877701	.	.	XP_961578.3	hypothetical protein	10.3764	2935.31	0.16368	20.6209	1.7823e-94	1.50017e-90	12.3862	9.01474	10.161	10.2246	11.7501	11.7579	591	402	6633	4870	8.83479	8.77647	90.3761	78.9793	17.644	17.4071	179.164	158.64
gene-NCU01230	rna-XM_956503.2	protein_coding	3877744	.	.	XP_961596.1	serum paraoxonase/arylesterase	2.02853	1552.89	0.18042	5.65589	1.55038e-08	3.73913e-07	11.022	10.0032	10.2333	10.3415	10.7224	10.8384	1150	811	2392	2026	8.29923	8.55721	15.7359	15.8677	16.5745	16.9722	31.1953	31.8722
gene-NCU01271	rna-XM_955656.3	protein_coding	3876899	spe-1	put-1	XP_960749.1	ornithine decarboxylase	-2.03569	29260.6	0.152103	-6.74224	1.55964e-11	6.34178e-10	14.2346	15.2602	14.9711	15.0784	14.4759	14.546	44776	30536	22725	18381	194.132	193.647	89.8056	86.4673	387.703	384.077	178.033	173.681
gene-NCU01315	rna-XM_956308.2	protein_coding	3877545	.	.	XP_961401.2	UDP-N-acetylglucosaminyltransferase	-2.10249	6880.8	0.151394	-7.08154	1.42557e-12	6.89739e-11	12.1151	13.187	12.9249	12.9601	12.3682	12.4471	11162	6946	5189	4259	27.1395	24.7021	11.4995	11.2335	54.2005	48.9937	22.797	22.5639
gene-NCU01348	rna-XM_956341.2	protein_coding	3877562	.	.	XP_961434.1	agmatinase	2.09716	1945.15	0.162144	6.58943	4.41528e-11	1.63715e-09	11.3629	10.2952	10.5714	10.619	11.0996	11.1313	1482	949	3211	2434	8.71829	8.16275	17.2158	15.5341	17.4114	16.1899	34.129	31.2022
gene-NCU01349	rna-XM_956342.2	protein_coding	3877526	.	.	XP_961435.2	hypothetical protein	-2.07078	1303.06	0.184845	-5.68137	1.33617e-08	3.25988e-07	9.73072	10.7785	10.5886	10.4692	9.97104	10.08	2318	1180	966	836	5.38304	4.00702	2.04482	2.10679	10.7505	7.94747	4.05371	4.23175
gene-NCU01355	rna-XM_011396212.1	protein_coding	23568360	.	.	XP_011394514.1	hypothetical protein	-2.46205	2684.93	0.177972	-7.30376	2.79844e-13	1.46301e-11	10.5992	11.8988	11.6944	11.503	11.0038	10.9263	5240	2446	2053	1316	42.335	28.905	15.1144	11.5286	84.5475	57.3297	29.9633	23.1566
gene-NCU01380	rna-XM_955844.2	protein_coding	3877075	.	.	XP_960937.1	hypothetical protein	2.88414	2464.69	0.157319	9.71364	2.63737e-22	4.43974e-20	11.8375	10.3102	10.7371	10.774	11.5056	11.4935	1509	952	4590	3289	10.0756	9.28991	27.9353	23.8246	20.122	18.4255	55.3798	47.8548
gene-NCU01400	rna-XM_955536.2	protein_coding	3876776	.	.	XP_960629.1	hypothetical protein	-2.11101	2738.9	0.176354	-6.11232	9.81918e-10	3.0274e-08	10.7823	11.8598	11.6983	11.5124	11.1149	11.0431	5093	2385	2317	1504	40.4403	27.6981	16.768	12.9516	80.7636	54.9359	33.2413	26.0149
gene-NCU01444	rna-XM_950873.2	protein_coding	3872117	.	.	XP_955966.1	rheb small monomeric GTPase RhbA	-2.12353	19781.2	0.14165	-7.67004	1.71948e-14	1.1048e-12	13.6287	14.7151	14.4875	14.4507	13.9288	13.9216	33703	19135	15858	11403	188.036	156.151	80.6425	69.0258	375.527	309.708	159.868	138.647
gene-NCU01456	rna-XM_011396237.1,rna-XM_011396238.1	protein_coding	3871991	.	.	XP_011394540.1; XP_011394539.1	DUF250 domain membrane protein, variant	-2.06641	5606.62	0.160316	-6.53165	6.50506e-11	2.34992e-09	11.8367	12.8833	12.7162	12.5638	12.1194	12.125	10151	4969	4535	3325	35.8518	25.6308	14.5967	12.7423	71.5998	50.8356	28.9368	25.5945
gene-NCU01493	rna-XM_950833.3	protein_coding	3872074	.	.	XP_955926.2	hypothetical protein	2.7582	172.281	0.337198	4.34086	1.41927e-05	0.00017263	7.97681	6.53364	6.94257	7.16807	7.63442	7.55114	84	85	333	214	0.716817	1.06536	2.60235	1.98828	1.43156	2.11303	5.15897	3.99371
gene-NCU01502	rna-XM_951858.3	protein_coding	3873114	.	.	XP_956951.1	small nucleolar ribonucleoprotein complex subunit	-2.09653	1286.54	0.177913	-6.00297	1.93735e-09	5.56543e-08	9.69979	10.7661	10.5314	10.4985	9.94996	10.0533	2177	1242	950	815	13.1135	10.937	5.21281	5.32448	26.1892	21.6923	10.334	10.6949
gene-NCU01504	rna-XM_951860.3	protein_coding	3873116	.	.	XP_956953.1	calcineurin binding protein	-2.10493	76906.8	0.16301	-6.58712	4.48426e-11	1.65544e-09	15.5963	16.67	16.3349	16.5079	15.8417	15.9278	113726	84261	57631	47791	738.562	800.379	341.132	336.756	1474.99	1587.46	676.27	676.416
gene-NCU01629	rna-XM_950691.2	protein_coding	3871931	.	.	XP_955784.1	hypothetical protein	-2.32007	3443.39	0.169193	-7.17624	7.16531e-13	3.65517e-11	11.0184	12.2326	11.8839	12.0231	11.3083	11.4031	5371	3816	2390	2018	27.6266	28.7081	11.2058	11.2609	55.1732	56.9391	22.2147	22.6188
gene-NCU01640	rna-XM_950915.2	protein_coding	3872155	rpn-4	.	XP_956008.2	C2H2 transcription factor	-5.73574	8071.95	0.202144	-12.4663	1.14047e-35	6.85667e-33	11.2269	13.7468	13.4068	13.0223	12.0326	11.9775	20585	7782	3141	2056	119.424	66.0353	16.6078	12.9404	238.503	130.973	32.9238	25.9924
gene-NCU01645	rna-XM_951174.3	protein_coding	3872422	.	.	XP_956267.2	hypothetical protein	-2.33091	25780.9	0.140838	-8.66878	4.36792e-18	4.65377e-16	13.9181	15.139	14.8797	14.8524	14.2614	14.2484	44941	25832	19469	13872	238.931	200.871	94.344	80.0184	477.171	398.405	187.03	160.727
gene-NCU01706	rna-XM_951819.3	protein_coding	3873034	.	.	XP_956912.3	MYB DNA-binding domain-containing protein	-2.00889	366.861	0.244551	-4.11528	3.86702e-05	0.000419983	7.93128	8.93555	8.63336	8.71772	8.16617	8.31293	562	379	264	250	4.97683	4.90065	2.12628	2.3975	9.93927	9.71987	4.21519	4.81567
gene-NCU01748	rna-XM_952078.3	protein_coding	3873323	.	.	XP_957171.3	hypothetical protein	-3.85714	16865.2	0.143156	-13.6043	3.77563e-42	4.53993e-39	12.7616	14.7092	14.3204	14.2776	13.349	13.3245	33643	19010	8829	6154	127.231	105.154	30.4314	25.2503	254.094	208.56	60.328	50.7184
gene-NCU01853	rna-XM_958794.3	protein_coding	3880036	.	.	XP_963887.3	choline dehydrogenase	2.27439	6652	0.191857	6.17897	6.45198e-10	2.06488e-08	13.1741	11.9878	12.4106	12.2	12.9907	12.8051	5788	2474	12853	7389	35.6853	22.3105	72.2322	49.4336	71.2675	44.2503	143.195	99.2935
gene-NCU01883	rna-XM_960421.2	protein_coding	3881692	.	.	XP_965514.1	SH3 domain signaling protein	-2.37562	9099.71	0.170875	-7.30534	2.76559e-13	1.46301e-11	12.3965	13.6447	13.4557	13.2599	12.7846	12.6945	17609	8184	7189	4535	77.2905	52.5402	28.7586	21.5944	154.357	104.208	57.0119	43.3751
gene-NCU01886	rna-XM_960424.3	protein_coding	3881695	.	.	XP_965517.1	hypothetical protein	-2.14545	41073.7	0.185525	-5.93604	2.91982e-09	8.19203e-08	14.6726	15.7739	15.3793	15.6438	14.8999	15.0299	57201	47602	29290	25989	170.688	207.76	79.6621	84.1436	340.882	412.068	157.924	169.013
gene-NCU01897	rna-XM_960435.2	protein_coding	3881674	.	.	XP_965528.2	hypothetical protein	-2.07725	1591.44	0.195292	-5.4005	6.6454e-08	1.41965e-06	10.0162	11.0683	10.8851	10.7496	10.2133	10.3963	2860	1427	1103	1073	18.6001	13.5736	6.53955	7.56966	37.1464	26.9218	12.9642	15.2046
gene-NCU01898	rna-XM_011394591.1,rna-XM_011394592.1	protein_coding	3881675	.	.	XP_011392893.1; XP_011392894.1	uncharacterized protein, hypothetical protein	-3.37502	14303	0.188678	-9.30103	1.39094e-20	1.98433e-18	12.6747	14.4297	14.1745	13.9058	13.2436	13.1067	31416	13461	9068	5245	183.993	112.366	48.1183	32.3772	367.454	222.864	95.391	65.0336
gene-NCU01904	rna-XM_960442.3	protein_coding	3881681	.	.	XP_965535.3	2-deoxy-D-gluconate 3-dehydrogenase	2.60095	2695.1	0.186166	7.40758	1.28625e-13	7.0301e-12	11.9272	10.5466	11.0093	10.8633	11.7001	11.5227	2051	959	5389	3133	23.9285	16.3598	57.3247	39.6721	47.7878	32.4478	113.642	79.6865
gene-NCU01905	rna-XM_960443.3	protein_coding	3881682	.	.	XP_965536.3	sorbitol dehydrogenase	2.16823	973.329	0.180749	6.17717	6.52606e-10	2.08068e-08	10.3795	9.26344	9.58773	9.59108	10.1488	10.0829	752	448	1730	1154	5.2663	4.59273	11.0522	8.77202	10.5174	9.10915	21.9102	17.6197
gene-NCU01924	rna-XM_011394595.1,rna-XM_011394596.1	protein_coding	3881648	.	.	XP_011392898.1; XP_011392897.1	hypothetical protein, uncharacterized protein	-2.01408	7279.46	0.145313	-6.95135	3.61809e-12	1.64613e-10	12.2379	13.248	13.0082	13.0256	12.499	12.5273	11779	7166	5885	4467	59.4544	52.8938	27.0592	24.4559	118.737	104.909	53.643	49.1227
gene-NCU01982	rna-XM_959253.3	protein_coding	3880486	.	.	XP_964346.3	hypothetical protein	-2.05448	4215.52	0.155376	-6.68556	2.30041e-11	8.92285e-10	11.4308	12.4692	12.2809	12.1774	11.7174	11.7144	7403	3857	3446	2493	46.4743	35.4133	19.7146	16.98	92.8141	70.2382	39.0827	34.1065
gene-NCU02046	rna-XM_959575.3	protein_coding	3880817	.	.	XP_964668.3	hypothetical protein	3.1431	10328.3	0.158347	10.434	1.73446e-25	4.56216e-23	13.9357	12.2838	12.7305	12.7854	13.5016	13.6481	5832	3795	17758	15461	23.613	22.4743	65.5414	67.9312	47.1577	44.5751	129.931	136.448
gene-NCU02051	rna-XM_959580.2	protein_coding	3880822	.	.	XP_964673.2	hypothetical protein	-2.61191	1578.89	0.171542	-8.0744	6.78067e-16	5.65078e-14	9.77162	11.1572	10.8786	10.8055	10.2091	10.14	2925	1587	1152	745	7.2709	5.77123	2.6105	2.00903	14.5208	11.4466	5.17512	4.0354
gene-NCU02073	rna-XM_959507.2	protein_coding	3880740	.	.	XP_964600.2	hypothetical protein	2.23147	243.159	0.265083	4.36843	1.25141e-05	0.000153544	8.3915	7.23369	7.61821	7.63731	8.06762	8.11354	182	111	403	315	1.41956	1.25694	2.86459	2.66516	2.83501	2.49299	5.67884	5.35332
gene-NCU02080	rna-XM_959514.2	protein_coding	3880747	.	.	XP_964607.1	hypothetical protein	2.32376	2267.77	0.190671	6.37987	1.77233e-10	6.08903e-09	11.6301	10.4156	10.665	10.8387	11.2669	11.4268	1442	1132	3543	3163	17.1019	19.6385	38.3101	40.7151	34.1543	38.9506	75.9469	81.7815
gene-NCU02084	rna-XM_959518.2	protein_coding	3880751	.	.	XP_964611.2	arginase	-2.63607	10933.7	0.166182	-8.41479	3.93609e-17	3.68112e-15	12.554	13.9526	13.687	13.5951	13.0154	12.8698	20522	10889	8355	4813	188.367	146.177	69.8976	47.9257	376.189	289.926	138.567	96.2648
gene-NCU02089	rna-XM_958676.2	protein_coding	3879918	.	.	XP_963769.1	hypothetical protein	2.05381	685.353	0.237583	4.37029	1.2408e-05	0.000152465	9.85022	8.80633	9.22395	8.98275	9.67319	9.50613	661	259	1278	742	2.73026	1.56185	4.8151	3.32784	5.45262	3.09774	9.54559	6.68439
gene-NCU02092	rna-XM_958891.2	protein_coding	3880133	.	.	XP_963984.2	hypothetical protein	-2.41212	527.228	0.210033	-6.0481	1.46561e-09	4.32845e-08	8.27171	9.54188	9.20038	9.26832	8.6389	8.68992	869	569	368	292	3.66629	3.511	1.41605	1.33418	7.32198	6.96366	2.80722	2.67987
gene-NCU02137	rna-XM_959202.2	protein_coding	3880435	.	.	XP_964295.2	phosphatidylinositol:UDP-GlcNAc transferase PIG-C	-2.05629	1865.16	0.212603	-4.89194	9.98466e-07	1.59372e-05	10.2526	11.2937	10.8624	11.1973	10.4909	10.5785	2411	2223	1415	1180	10.2249	13.7862	5.46834	5.42671	20.4203	27.3433	10.8406	10.9002
gene-NCU02138	rna-XM_959203.2	protein_coding	3880436	.	.	XP_964296.1	hypothetical protein	-2.70633	14509.2	0.14334	-10.0205	1.23881e-23	2.60677e-21	12.9346	14.371	14.0649	14.0455	13.3582	13.3206	26257	15250	10042	6874	110.936	94.2404	38.67	31.5122	221.551	186.915	76.6604	63.2963
gene-NCU02175	rna-XM_959152.2	protein_coding	3880394	.	.	XP_964245.2	phosphatidyl inositol-specific phospholipase C	-3.5615	32192.1	0.20942	-8.7503	2.12795e-18	2.3261e-16	13.7849	15.6174	15.3827	15.0254	14.3913	14.2154	74718	28788	20151	10904	272.835	153.752	67.066	43.2018	544.881	304.949	132.953	86.7763
gene-NCU02182	rna-XM_959159.2	protein_coding	3880401	.	.	XP_964252.1	hypothetical protein	-2.90284	3484.55	0.156627	-9.81607	9.60101e-23	1.68358e-20	10.8027	12.3395	12.0441	11.9554	11.2299	11.2627	6695	3568	2165	1660	27.4307	21.3807	8.08424	7.37619	54.7821	42.4062	16.0264	14.816
gene-NCU02188	rna-XM_954489.3	protein_coding	3875729	.	.	XP_959582.3	sugar transporter	2.30057	6914.56	0.154608	7.77443	7.57867e-15	5.3158e-13	13.2345	12.0331	12.3138	12.4153	12.9557	12.9716	4727	3294	11878	8814	27.3852	27.9074	62.7175	55.4022	54.6912	55.3511	124.333	111.282
gene-NCU02191	rna-XM_954492.2	protein_coding	3875732	.	.	XP_959585.2	hypothetical protein	-2.53574	19231.4	0.163234	-8.22381	1.97135e-16	1.7652e-14	13.4092	14.7516	14.5364	14.3607	13.8174	13.744	37469	17897	14329	9278	180.389	126.02	62.8738	48.4639	360.257	249.947	124.643	97.3458
gene-NCU02198	rna-XM_954499.2	protein_coding	3875739	.	.	XP_959592.1	hypothetical protein	2.92301	35.6726	0.640748	2.41508	0.0157318	0.0641235	5.72424	4.20792	4.89273	5.01874	5.17876	5.28373	15	18	56	55	0.10471	0.182187	0.36852	0.430735	0.209118	0.361347	0.730565	0.865186
gene-NCU02238	rna-XM_954404.2	protein_coding	3875646	.	.	XP_959497.1	pantothenate transporter liz1	2.64937	4343.63	0.151617	9.27105	1.8433e-20	2.58584e-18	12.6225	11.2175	11.5895	11.6442	12.3038	12.3173	2789	1810	7784	5758	14.1396	13.4214	35.9767	31.6809	28.2383	26.6198	71.3213	63.635
gene-NCU02246	rna-XM_954797.3	protein_coding	3876053	.	.	XP_959890.2	hypothetical protein	2.36922	737.726	0.192495	6.46464	1.01537e-10	3.59091e-09	10.0195	8.77313	9.16489	9.13351	9.69578	9.75451	552	309	1241	977	1.91806	1.56842	3.93312	3.68785	3.83058	3.11078	7.79713	7.40751
gene-NCU02295	rna-XM_954846.2	protein_coding	3876077	mss4	.	XP_959939.2	phosphatidylinositol-4-phosphate 5-kinase its3	-2.01078	11046.6	0.1564	-6.44346	1.16781e-10	4.09561e-09	12.8413	13.8489	13.6873	13.5428	13.1282	13.0988	19731	9758	9343	6494	43.097	31.1752	18.6009	15.3897	86.0693	61.8325	36.8749	30.9121
gene-NCU02307	rna-XM_954858.3	protein_coding	3876066	.	.	XP_959951.3	hypothetical protein	2.11206	20846.9	0.144719	7.45343	9.09426e-14	5.2429e-12	14.7883	13.7097	13.9922	14.0147	14.5072	14.5793	16125	9926	33619	26789	47.9251	43.1495	91.0779	86.3917	95.7116	85.582	180.555	173.529
gene-NCU02363	rna-XM_954691.2	protein_coding	3875938	.	.	XP_959784.2	RTA1 domain-containing protein	-2.97972	5208.36	0.166011	-9.4884	2.34619e-21	3.65701e-19	11.3538	12.9292	12.6436	12.5196	11.8576	11.7511	10281	5247	3545	2161	116.936	87.2821	36.7503	26.659	233.535	173.114	72.8549	53.548
gene-NCU02369	rna-XM_954697.3	protein_coding	3875944	gh28-1	.	XP_959790.3	polygalacturonase	-2.03737	7060.45	0.168236	-6.1028	1.04223e-09	3.20163e-08	12.1828	13.2094	13.0511	12.8877	12.5103	12.4083	12806	6181	6241	3880	110.25	77.8258	48.968	36.2451	220.181	154.359	97.0755	72.8028
gene-NCU02400	rna-XM_954627.2	protein_coding	3875867	.	.	XP_959720.2	metacaspase-1B	-3.63847	16984.8	0.145016	-12.8491	8.70228e-38	7.32471e-35	12.8384	14.7016	14.2926	14.3202	13.3577	13.4102	32079	19736	8715	6924	114.439	102.979	28.3347	26.8007	228.547	204.247	56.1714	53.8325
gene-NCU02401	rna-XM_954628.3	protein_coding	3875868	.	.	XP_959721.3	regulatory factor Sgt1	2.03888	221.833	0.336372	3.05548	0.00224702	0.0132353	8.22111	7.18255	7.65045	7.38261	8.05889	7.79331	228	76	446	216	1.02963	0.501654	1.84269	1.06166	2.05628	0.994973	3.653	2.13248
gene-NCU02478	rna-XM_959979.2	protein_coding	3881212	.	.	XP_965072.2	alpha-1,3-glucan synthase Ags2	-4.48338	3498.23	0.159425	-13.5775	5.44714e-42	5.73107e-39	10.3182	12.4817	12.0304	12.0299	10.9392	11.0227	7003	4167	1471	1242	10.7922	9.39216	2.06585	2.07647	21.5532	18.6283	4.09539	4.17084
gene-NCU02480	rna-XM_011394652.1,rna-XM_011394653.1	protein_coding	3881214	.	.	XP_011392954.1; XP_011392955.1	short-chain dehydrogenase/reductase, variant	2.09674	6904.51	0.149465	7.14647	8.90357e-13	4.48751e-11	13.1907	12.1226	12.4213	12.4092	12.9876	12.9053	5513	3217	12251	8021	47.4016	40.4292	95.9589	74.558	94.6661	80.1867	190.232	149.759
gene-NCU02486	rna-XM_959987.1	protein_coding	3881220	.	.	XP_965080.1	hypothetical protein	-4.66704	196.254	0.31954	-6.95534	3.51721e-12	1.60893e-10	6.12377	8.33438	7.91933	7.67718	6.94272	7.04171	461	196	76	71	3.81921	2.38	0.572541	0.633672	7.62738	4.72045	1.13502	1.27281
gene-NCU02590	rna-XM_959900.2	protein_coding	3881169	.	.	XP_964993.2	hypothetical protein	-2.17117	1379.83	0.171063	-6.5384	6.2182e-11	2.26574e-09	9.76557	10.8836	10.6604	10.5836	10.0954	10.0745	2428	1308	1103	774	7.63199	6.01462	3.1597	2.63978	15.2419	11.9293	6.26389	5.30234
gene-NCU02592	rna-XM_959902.2	protein_coding	3881171	.	.	XP_964995.1	chitin synthase activator	-2.15212	5732.73	0.154185	-7.17165	7.41003e-13	3.75724e-11	11.8288	12.9344	12.7323	12.6299	12.1527	12.1126	10209	5331	4671	3190	29.4789	22.5149	12.2926	9.99371	58.8724	44.6558	24.3692	20.0736
gene-NCU02600	rna-XM_959910.2	protein_coding	3881143	.	.	XP_965003.2	DUF1479 domain-containing protein	2.02956	167.497	0.30702	3.32607	0.000880813	0.00613218	7.80803	6.79297	7.11986	7.18484	7.56118	7.49256	127	86	294	192	0.6964	0.684298	1.47166	1.1441	1.39078	1.35723	2.91745	2.29807
gene-NCU02802	rna-XM_959365.2	protein_coding	3880622	arg-13	arg(RU3)	XP_964458.1	mitochondrial ornithine carrier protein	-2.68071	1474.52	0.184383	-7.71556	1.2045e-14	8.04625e-13	9.64563	11.0688	10.8078	10.6785	10.1153	10.0046	2845	1437	1091	657	14.9801	11.0609	5.23306	3.74989	29.9169	21.9381	10.3742	7.53212
gene-NCU02819	rna-XM_011394736.1,rna-XM_011394737.1,rna-XM_011394738.1	protein_coding	3879861	.	.	XP_011393038.1; XP_011393039.1; XP_011393040.1	high mobility group protein, variant 1, high mobility group protein, variant 2	-2.25476	6599.95	0.16814	-6.97618	3.03324e-12	1.41838e-10	11.9857	13.1587	12.9698	12.8072	12.3565	12.2573	12347	5977	5441	3387	46.126	32.6442	18.508	13.725	92.1185	64.746	36.6907	27.5684
gene-NCU02884	rna-XM_960473.2	protein_coding	3881707	.	.	XP_965566.1	hypothetical protein	2.48096	4902.49	0.192011	6.82718	8.65992e-12	3.70003e-10	12.7703	11.4608	11.6966	11.9369	12.4295	12.5159	2798	2442	8225	6669	27.1023	34.5989	72.6193	70.0915	54.1263	68.6228	143.962	140.788
gene-NCU02913	rna-XM_960502.2	protein_coding	3881775	.	.	XP_965595.2	DNA repair protein rad5	-2.40731	8366.45	0.194742	-6.50821	7.60491e-11	2.71231e-09	12.2618	13.5292	13.3693	13.0911	12.6819	12.5283	16990	7116	6853	3909	75.0889	45.9968	27.6059	18.7456	149.961	91.2293	54.7268	37.6528
gene-NCU02929	rna-XM_960518.1	protein_coding	3881736	.	.	XP_965611.1	hypothetical protein	-2.17555	289.982	0.260502	-4.30469	1.67219e-05	0.000201356	7.51525	8.63307	8.31831	8.3655	7.80379	7.94613	468	300	197	188	2.5693	2.40605	0.98599	1.11792	5.13116	4.77213	1.95465	2.24548
gene-NCU02975	rna-XM_960269.3	protein_coding	3881525	.	.	XP_965362.2	hypothetical protein	-2.0609	6636.12	0.195479	-5.33701	9.44895e-08	1.93038e-06	12.0822	13.1254	13.011	12.7324	12.4333	12.2824	12874	5360	6023	3472	73.803	44.9376	31.4716	21.5944	147.392	89.1284	62.3901	43.375
gene-NCU03121	rna-XM_959887.2	protein_coding	3881138	.	.	XP_964980.1	hypothetical protein	-2.04316	5039.07	0.148515	-6.94074	3.90052e-12	1.76509e-10	11.6935	12.7241	12.5118	12.4636	11.9723	11.9798	8540	4777	4101	3015	34.0556	27.8597	14.9032	13.044	68.0127	55.2564	29.5445	26.2006
gene-NCU03153	rna-XM_959466.2	protein_coding	3880724	.	.	XP_964559.1	hypothetical protein	-3.3648	23.6761	0.837032	-2.09135	0.0364971	0.122146	3.43204	5.19216	4.74743	4.45905	4.42448	4.31936	66	14	20	5	0.419544	0.126545	0.115503	0.031199	0.837874	0.250986	0.228977	0.062668
gene-NCU03208	rna-XM_960215.2	protein_coding	3881457	.	.	XP_965308.1	hypothetical protein	-2.07311	153.919	0.324311	-3.24318	0.00118203	0.00785254	6.64608	7.69824	7.46343	7.33638	7.06586	6.97707	280	136	138	81	2.40045	1.70696	1.07938	0.747752	4.79396	3.38556	2.1398	1.50195
gene-NCU03240	rna-XM_960247.3	protein_coding	3881489	.	.	XP_965340.3	hypothetical protein	-2.16302	11348.5	0.148294	-7.5057	6.11032e-14	3.67361e-12	12.8089	13.922	13.7008	13.638	13.1423	13.084	19761	10857	9336	6204	79.8569	64.1701	34.3879	27.2019	159.483	127.274	68.1715	54.6385
gene-NCU03260	rna-XM_959320.3	protein_coding	3880562	.	.	XP_964413.3	hypothetical protein	-2.31622	6134.15	0.153308	-7.90414	2.69781e-15	2.00951e-13	11.8533	13.0648	12.845	12.7351	12.1947	12.1841	11219	5809	4646	3321	25.0996	19.0086	9.47401	8.06148	50.1267	37.7013	18.7815	16.1925
gene-NCU03270	rna-XM_959330.2	protein_coding	3880572	.	.	XP_964423.2	hypothetical protein	-2.03066	5272.59	0.148761	-6.86975	6.43161e-12	2.79046e-10	11.7646	12.7867	12.5237	12.5801	12.0411	12.0476	8338	5334	4311	3165	65.3545	61.1465	30.7984	26.9181	130.52	121.277	61.0557	54.0685
gene-NCU03274	rna-XM_011394827.1,rna-XM_011394828.1	protein_coding	3880576	.	.	XP_011393129.1; XP_011393130.1	uncharacterized protein, hypothetical protein	-2.67715	10485.2	0.181264	-7.83772	4.58817e-15	3.32919e-13	12.4774	13.8982	13.6776	13.4752	12.9471	12.7937	21038	9728	7969	4531	122.032	79.4965	40.5801	27.9639	243.712	157.672	80.4471	56.169
gene-NCU03402	rna-XM_951756.3	protein_coding	3872996	.	.	XP_956849.3	membrane transporter	2.85993	26.1179	0.737156	2.05653	0.0397317	0.130479	5.28007	3.74197	4.59076	4.52756	4.86068	4.69697	21	7	61	26	0.090211	0.043374	0.246957	0.125073	0.18016	0.086026	0.489575	0.251226
gene-NCU03500	rna-XM_950744.3	protein_coding	3871984	.	.	XP_955837.2	aminotransferase	-7.49918	7019.22	0.184476	-15.7567	6.17478e-56	2.59866e-52	10.6905	13.5964	12.9187	13.1262	11.5648	11.6972	13348	10104	1784	1695	64.5668	71.4902	7.86341	8.89481	128.947	141.793	15.5886	17.8664
gene-NCU03501	rna-XM_950745.3	protein_coding	3871985	.	.	XP_955838.2	von Willebrand factor	-2.35353	8666.94	0.164374	-7.5123	5.80958e-14	3.51793e-12	12.3355	13.5705	13.35	13.2307	12.7348	12.6143	16012	8198	7042	4238	62.7532	46.9918	25.1555	18.0183	125.325	93.2028	49.8689	36.1921
gene-NCU03512	rna-XM_950775.1	protein_coding	3872015	.	.	XP_955868.1	hypothetical protein	2.28896	465.346	0.236918	5.04262	4.59201e-07	7.87188e-06	9.337	8.1496	8.42143	8.60302	8.99834	9.08738	292	240	755	622	2.59744	3.11506	6.12541	6.00774	5.18737	6.17835	12.1432	12.0673
gene-NCU03552	rna-XM_950698.2	protein_coding	3871938	.	.	XP_955791.1	hypothetical protein	-2.09166	163.918	0.343365	-3.10062	0.00193115	0.0116547	6.72903	7.79281	7.36866	7.58897	6.99924	7.1804	222	191	106	115	1.35386	1.70231	0.589432	0.755955	2.70381	3.37633	1.16851	1.51843
gene-NCU03590	rna-XM_955541.2	protein_coding	3876781	.	.	XP_960634.1	hypothetical protein	2.06673	404.155	0.22627	4.62877	3.67843e-06	5.12606e-05	9.09079	8.03921	8.40543	8.33219	8.82662	8.82902	345	178	677	495	2.39891	1.81049	4.29449	3.74	4.79088	3.5909	8.51351	7.51226
gene-NCU03599	rna-XM_956233.2	protein_coding	3877490	.	.	XP_961326.1	hypothetical protein	-4.28569	19.892	0.843381	-2.48942	0.0127953	0.0545201	2.9031	5.01363	4.25255	4.41251	4.10048	4.11213	27	31	9	7	0.29446	0.49124	0.085814	0.082837	0.588068	0.974317	0.170119	0.166389
gene-NCU03646	rna-XM_011396253.1,rna-XM_011396254.1	protein_coding	3877505	.	.	XP_011394555.1; XP_011394556.1	uncharacterized protein, hypothetical protein	-2.29145	3601	0.150855	-7.92985	2.19408e-15	1.64889e-13	11.0953	12.2918	12.0119	12.0294	11.4404	11.4199	6070	3694	2769	1948	16.793	15.0877	7.01274	5.85882	33.5375	29.9247	13.9022	11.7682
gene-NCU03728	rna-XM_956411.3	protein_coding	3877604	.	.	XP_961504.3	hypothetical protein	-3.2173	4103.16	0.169325	-9.95633	2.36631e-23	4.63192e-21	10.9264	12.612	12.3345	12.1453	11.4349	11.3977	8555	4031	2500	1706	32.3306	22.283	8.61043	6.99349	64.5677	44.1957	17.0696	14.0473
gene-NCU03730	rna-XM_956413.2	protein_coding	3877606	.	.	XP_961506.1	tRNA '-O-ribosylphosphate transferase	-2.70564	7077.06	0.160442	-8.9501	3.55172e-19	4.32913e-17	11.8991	13.3352	13.0746	12.9565	12.3483	12.2588	13583	6976	5099	3208	54.8539	41.2032	18.7668	14.0567	109.549	81.7218	37.2039	28.2346
gene-NCU03878	rna-XM_951458.2	protein_coding	3872689	.	.	XP_956551.2	hypothetical protein	-2.83905	2928.11	0.159628	-9.43073	4.07252e-21	6.01375e-19	10.5757	12.0802	11.7848	11.7071	10.9818	11.038	5558	3002	1813	1445	14.3561	11.3397	4.26797	4.0486	28.6707	22.491	8.46095	8.13212
gene-NCU03888	rna-XM_952434.3	protein_coding	3873753	.	.	XP_957527.1	DUF500 and SH3 domain-containing protein	-2.1549	32395	0.159035	-6.96466	3.29189e-12	1.51409e-10	14.3259	15.4335	15.2425	15.1179	14.6774	14.5729	58457	29697	27618	17102	283.808	210.88	122.214	90.0886	566.795	418.255	242.28	180.954
gene-NCU03921	rna-XM_952467.3	protein_coding	3873745	.	.	XP_957560.3	mitochondrial chaperone bcs1	-4.36503	6251.18	0.199482	-10.6576	1.60717e-26	5.0102e-24	11.1862	13.3123	13.0132	12.6872	11.8784	11.7605	14866	5976	3206	1888	52.0929	30.6286	10.2391	7.17722	104.035	60.7482	20.2983	14.4164
gene-NCU03931	rna-XM_952477.3	protein_coding	3873708	ada-5	.	XP_957570.2	ADA-5	-2.21299	17040.1	0.14232	-8.05227	8.12709e-16	6.64133e-14	13.3727	14.5187	14.2581	14.2633	13.7047	13.6693	28649	17155	13567	9340	113.2	99.1443	48.8596	40.0414	226.072	196.641	96.8606	80.4281
gene-NCU03950	rna-XM_952496.3	protein_coding	3873679	.	.	XP_957589.2	hypothetical protein	-2.46183	10050.6	0.142789	-9.10249	8.82845e-20	1.12589e-17	12.5035	13.8032	13.5154	13.5122	12.8663	12.8661	17537	10393	7232	5255	107.584	93.2493	40.4367	34.9788	214.857	184.949	80.1628	70.2592
gene-NCU03952	rna-XM_952498.3	protein_coding	3873681	.	.	XP_957591.3	U3 small nucleolar ribonucleoprotein Mpp10	-2.48266	1956.72	0.176511	-7.43231	1.06715e-13	5.94848e-12	10.1347	11.4457	11.2315	11.0537	10.5175	10.5007	3800	1803	1420	1003	14.159	9.82535	4.82247	4.05544	28.2771	19.4874	9.5602	8.14586
gene-NCU04021	rna-XM_952543.2	protein_coding	3873823	.	.	XP_957636.2	ABC transporter	-3.3282	3381.83	0.175947	-9.85947	6.23808e-23	1.11715e-20	10.6098	12.3446	11.8647	12.0586	11.0773	11.1567	5608	4241	1816	1509	11.7592	13.0084	3.47092	3.43323	23.4843	25.8007	6.88085	6.89608
gene-NCU04034	rna-XM_952556.3	protein_coding	3873771	.	.	XP_957649.1	hypothetical protein	-2.18491	14911.5	0.161863	-6.96623	3.25536e-12	1.50551e-10	13.1928	14.3205	13.9771	14.1441	13.466	13.5327	22409	16476	11060	8912	256.323	275.645	115.307	110.6	511.904	546.71	228.587	222.153
gene-NCU04095	rna-XM_011396306.1,rna-XM_011396307.1	protein_coding	3877004	.	.	XP_011394609.1; XP_011394608.1	SH3 domain-containing protein, variant	-2.34256	2253.87	0.161799	-7.59018	3.19465e-14	1.99181e-12	10.3979	11.625	11.3709	11.3187	10.7144	10.7759	3995	2225	1598	1281	8.70273	7.09218	3.17489	3.02879	17.3803	14.0665	6.29398	6.0837
gene-NCU04096	rna-XM_011396308.1,rna-XM_011396309.1	protein_coding	3877005	prk-9	.	XP_011394611.1; XP_011394610.1	serine/threonine-protein kinase 3, variant	-2.63056	581.315	0.209223	-6.66931	2.57011e-11	9.87791e-10	8.3253	9.71747	9.44569	9.3252	8.73163	8.78227	1112	565	382	303	4.65715	3.45332	1.44086	1.37134	9.30083	6.84926	2.8564	2.75452
gene-NCU04148	rna-XM_956211.2	protein_coding	3877411	.	.	XP_961304.1	hypothetical protein	-4.22402	816.268	0.214422	-9.69407	3.19529e-22	5.17207e-20	8.2866	10.3666	10.0096	9.8026	9.01131	8.90482	1823	839	431	252	28.9703	19.5011	6.24374	4.34303	57.8569	38.6783	12.3778	8.72353
gene-NCU04211	rna-XM_956078.2	protein_coding	3877294	.	.	XP_961171.2	hypothetical protein	-2.1103	613.503	0.204938	-5.25744	1.46075e-07	2.83952e-06	8.62515	9.70071	9.4994	9.37348	8.94959	8.94345	1105	555	495	355	7.88832	5.79272	3.21764	2.74343	15.7538	11.4892	6.37873	5.51053
gene-NCU04218	rna-XM_955749.2	protein_coding	3876989	.	.	XP_960842.1	RTA1 domain-containing protein	-2.22124	1653.94	0.166485	-6.91575	4.65391e-12	2.07259e-10	10.0037	11.1556	10.8998	10.8787	10.3615	10.3004	2830	1640	1342	883	19.4281	16.4666	8.39854	6.5728	38.8	32.6596	16.6495	13.2023
gene-NCU04223	rna-XM_955754.3	protein_coding	3876994	.	.	XP_960847.3	hypothetical protein	-2.27058	267.711	0.309755	-3.81935	0.000133801	0.00123487	7.35499	8.53805	8.36939	8.05243	7.82975	7.63599	559	209	244	119	2.3191	1.26717	0.922365	0.533064	4.63149	2.51329	1.82852	1.07073
gene-NCU04261	rna-XM_956159.2	protein_coding	3877384	.	.	XP_961252.2	hypothetical protein	2.08131	72.1973	0.459168	2.30306	0.0212755	0.0804112	6.60055	5.56535	5.89139	6.07314	6.27852	6.26549	42	44	122	87	0.432203	0.671974	1.16001	0.983288	0.863156	1.33278	2.29963	1.97506
gene-NCU04276	rna-XM_955973.3	protein_coding	3877220	.	.	XP_961066.1	hypothetical protein	-5.01783	3002.34	0.164773	-14.1229	2.74532e-45	4.62147e-42	9.96311	12.2896	11.7548	11.8613	10.657	10.7228	5737	3881	1168	958	52.8929	52.3293	9.8124	9.57777	105.633	103.789	19.4524	19.2382
gene-NCU04343	rna-XM_951231.3	protein_coding	3872471	egt-1	.	XP_956324.3	DUF323 domain-containing protein	2.77734	24022.4	0.151908	9.70131	2.97649e-22	4.91238e-20	15.1084	13.6347	14.0745	14.0242	14.8431	14.7235	16204	8890	47235	29617	57.7707	46.3555	153.498	114.572	115.374	91.9408	304.299	230.133
gene-NCU04419	rna-XM_952403.3	protein_coding	3873602	.	.	XP_957496.3	2-oxoglutarate-dependent ethylene/succinate-forming enzyme	-2.13098	1534.88	0.181032	-6.02941	1.6456e-09	4.76821e-08	9.93734	11.0288	10.7065	10.8349	10.194	10.2937	2343	1650	1124	958	13.442	13.8449	5.87582	5.96033	26.8452	27.4598	11.6484	11.9721
gene-NCU04421	rna-XM_011395798.1,rna-XM_011395799.1	protein_coding	3873604	anx14	.	XP_011394100.1; XP_011394101.1	annexin XIV, variant	-2.52804	5246.84	0.149523	-8.9486	3.60032e-19	4.32913e-17	11.5384	12.8764	12.5526	12.6025	11.8981	11.9321	8917	5650	3604	2765	45.9012	42.491	16.8606	15.3709	91.6695	84.276	33.4248	30.8744
gene-NCU04435	rna-XM_952419.2	protein_coding	3873643	.	.	XP_957512.1	general amino acid permease AGP3	2.50295	2379.51	0.165763	7.98505	1.40467e-15	1.09473e-13	11.7312	10.4087	10.7439	10.8271	11.3925	11.4706	1554	1056	4022	3231	8.91804	8.85942	21.0432	20.1229	17.8103	17.5716	41.7166	40.4193
gene-NCU04460	rna-XM_951936.2	protein_coding	3873213	.	.	XP_957029.1	galactose-1-phosphate uridylyltransferase	2.03549	1142.54	0.179272	5.71966	1.06737e-08	2.658e-07	10.5809	9.55735	9.825	9.87449	10.3835	10.2917	887	570	2022	1303	6.44332	6.05383	13.397	10.2738	12.868	12.0071	26.5586	20.6362
gene-NCU04493	rna-XM_951969.3	protein_coding	3873205	.	.	XP_957062.1	hypothetical protein	-2.76707	37914.3	0.141967	-10.343	4.50335e-25	1.11484e-22	14.297	15.7654	15.4143	15.4728	14.7109	14.7105	65735	42042	25072	18216	266.185	249.008	92.5357	80.0336	531.601	493.879	183.445	160.758
gene-NCU04504	rna-XM_951822.2	protein_coding	3873086	.	.	XP_956915.1	ATP-dependent rRNA helicase rrp-3	-2.18402	2415.29	0.155925	-7.22778	4.90944e-13	2.53514e-11	10.5672	11.6941	11.4462	11.4247	10.8861	10.8807	4112	2381	1898	1367	26.0815	22.0916	10.9707	9.40927	52.0876	43.8162	21.7486	18.8997
gene-NCU04514	rna-XM_951832.2	protein_coding	3873063	.	.	XP_956925.2	GTPase-activating protein gyp3	-2.36567	3150.36	0.166897	-7.44321	9.8266e-14	5.58855e-12	10.8705	12.1126	11.8949	11.7615	11.2556	11.1807	5880	2954	2471	1593	12.8685	9.4548	4.92751	3.78068	25.6997	18.7525	9.76844	7.59398
gene-NCU04526	rna-XM_951844.2	protein_coding	3873075	.	.	XP_956937.1	hypothetical protein	-2.55997	12139.5	0.143211	-9.46947	2.8127e-21	4.30445e-19	12.7356	14.0917	13.81	13.7724	13.1219	13.1089	21879	12420	8580	6110	126.693	105.19	45.2808	38.3878	253.019	208.633	89.7658	77.1067
gene-NCU04537	rna-XM_950884.2	protein_coding	3872127	.	.	XP_955977.1	monosaccharide transporter	-2.48872	40.9921	0.564179	-2.33154	0.0197251	0.075988	4.55428	5.8701	5.46803	5.41358	5.18784	5.16927	76	40	31	20	0.546473	0.417438	0.201736	0.151018	1.09137	0.827939	0.399926	0.303339
gene-NCU04544	rna-XM_950891.3	protein_coding	3872134	.	.	XP_955984.1	hypothetical protein	-2.05479	2303.09	0.1628	-6.38205	1.74736e-10	6.05248e-09	10.5577	11.5975	11.3538	11.3591	10.889	10.803	3780	2266	2004	1272	14.7462	12.9286	7.12655	5.38305	29.4498	25.6424	14.1279	10.8125
gene-NCU04554	rna-XM_950852.2	protein_coding	3872093	gh18-5	.	XP_955945.2	endochitinase 1	-2.6019	8096.27	0.167195	-8.25124	1.56758e-16	1.43417e-14	12.1343	13.5138	13.291	13.1137	12.5604	12.478	15902	7581	5966	3802	95.37	66.4993	32.6126	24.7413	190.464	131.894	64.6522	49.6961
gene-NCU04603	rna-XM_953753.3	protein_coding	3874993	.	.	XP_958846.1	hypothetical protein	-2.35332	13857.9	0.143923	-8.57888	9.58027e-18	9.71531e-16	13.0129	14.2475	13.985	13.9575	13.3337	13.3751	24227	13924	9960	7724	135.733	114.096	50.8599	46.9487	271.072	226.296	100.826	94.3024
gene-NCU04630	rna-XM_952805.2	protein_coding	3874045	.	.	XP_957898.1	hypothetical protein	-2.06442	2784.08	0.182211	-5.73915	9.51557e-09	2.39082e-07	10.8278	11.8729	11.7357	11.5089	11.141	11.0865	5260	2335	2360	1575	24.9723	16.213	10.2126	8.10981	49.8723	32.1566	20.2457	16.2896
gene-NCU04634	rna-XM_954084.3	protein_coding	3875340	.	.	XP_959177.3	isoflavone reductase	-2.11354	194.539	0.318052	-3.39461	0.000687269	0.00494	6.97281	8.04149	7.85097	7.61591	7.27269	7.40446	383	156	134	130	2.68811	1.59953	0.855503	0.989311	5.36845	3.17248	1.69597	1.98716
gene-NCU04637	rna-XM_954087.2	protein_coding	3875343	.	.	XP_959180.2	BAR adaptor protein RVS167	-2.12487	12124	0.155144	-7.00883	2.40322e-12	1.1364e-10	12.9218	14.0092	13.8137	13.707	13.2571	13.1774	21556	11198	10254	6594	90.8799	69.055	39.4051	30.1625	181.497	136.963	78.1177	60.5853
gene-NCU04638	rna-XM_954088.2	protein_coding	3875344	.	.	XP_959181.1	hypothetical protein	-2.21343	262.948	0.271595	-4.22056	2.43701e-05	0.000278322	7.35501	8.50058	8.28111	8.11418	7.7757	7.69048	497	232	222	135	1.74674	1.19028	0.710098	0.513967	3.48843	2.36079	1.40772	1.03237
gene-NCU04644	rna-XM_954094.2	protein_coding	3875325	.	.	XP_959187.1	hypothetical protein	-2.22687	5129.54	0.167979	-6.87598	6.15672e-12	2.68503e-10	11.6343	12.7896	12.5828	12.4663	12.0138	11.887	9309	4777	4350	2593	67.9835	51.0234	28.9494	20.5415	135.77	101.199	57.39	41.2602
gene-NCU04720	rna-XM_955262.3	protein_coding	3876518	nit-6	.	XP_960355.3	nitrite reductase	2.18845	14107.5	0.141695	7.9742	1.53373e-15	1.18435e-13	14.2412	13.1113	13.4221	13.4206	13.9936	13.9792	10851	6437	24331	17373	32.709	28.3808	66.851	56.8243	65.3235	56.29	132.527	114.139
gene-NCU04841	rna-XM_955307.3	protein_coding	3876538	.	.	XP_960400.1	class E vacuolar protein-sorting machinery protein hse-1	-2.37271	3633.34	0.162013	-7.69407	1.42522e-14	9.37191e-13	11.0733	12.3196	11.9934	12.0796	11.3758	11.4669	5916	3928	2490	2091	19.6852	19.115	7.54977	7.54949	39.3134	37.9124	14.9669	15.1641
gene-NCU04848	rna-XM_955314.3	protein_coding	3876545	.	.	XP_960407.3	hypothetical protein	2.35917	3880.64	0.151701	8.16263	3.27815e-16	2.87418e-14	12.4123	11.174	11.5166	11.5264	12.1049	12.1604	2809	1695	6547	5109	7.85825	6.93388	16.6955	15.5085	15.6938	13.7525	33.0976	31.1508
gene-NCU04950	rna-XM_011395820.1,rna-XM_011395821.1	protein_coding	3875536	.	.	XP_011394123.1; XP_011394122.1	uncharacterized protein, hypothetical protein	-3.51853	51.9934	0.527404	-3.44134	0.000578844	0.00427005	4.53571	6.33615	5.79832	5.80532	5.3477	5.45315	97	60	22	26	1.00178	0.86411	0.191935	0.274563	2.00067	1.71386	0.380498	0.551495
gene-NCU04994	rna-XM_011396629.1	protein_coding	3871961	.	.	XP_011394931.1	leucine aminopeptidase 2	2.3547	799.94	0.25439	4.85687	1.19255e-06	1.85197e-05	10.1314	8.90169	9.09001	9.39764	9.71227	9.93851	435	438	1188	1167	2.93862	4.32035	7.30916	8.54766	5.86875	8.56892	14.4899	17.169
gene-NCU05022	rna-XM_951198.2	protein_coding	3872429	.	.	XP_956291.1	hypothetical protein	-2.36826	64.3259	0.465524	-2.67189	0.00754261	0.035787	5.26136	6.4966	6.17673	6.03547	5.78558	5.81096	127	56	46	36	1.86783	1.19792	0.614512	0.575522	3.73025	2.37594	1.21823	1.15601
gene-NCU05036	rna-XM_951251.2	protein_coding	3872491	.	.	XP_956344.2	hypothetical protein	2.56951	61.5908	0.518203	2.62734	0.00860551	0.0396381	6.47422	5.09907	5.7641	5.65369	6.18224	5.90171	52	19	143	57	0.607025	0.310025	1.51715	0.718369	1.21229	0.614898	3.00764	1.44294
gene-NCU05038	rna-XM_951253.2	protein_coding	3872493	.	.	XP_956346.1	2OG-Fe(II) oxygenase	-3.5986	30.3431	0.694365	-2.66061	0.00779995	0.0366772	3.74468	5.5632	5.0194	4.96056	4.63949	4.7558	62	32	10	17	0.569326	0.424828	0.084478	0.165248	1.13701	0.842597	0.167471	0.331922
gene-NCU05058	rna-XM_951339.2	protein_coding	3872570	.	.	XP_956432.1	hypothetical protein	3.29701	26.7724	0.738533	2.33051	0.0197791	0.0760598	5.35629	3.65314	4.54175	4.57612	4.91922	4.68886	14	10	69	24	0.351979	0.364989	1.59075	0.65951	0.702939	0.723915	3.15355	1.32471
gene-NCU05131	rna-XM_011396640.1,rna-XM_011396641.1	protein_coding	3873264	.	.	XP_011394942.1; XP_011394943.1	hypothetical protein, uncharacterized protein	-4.2728	5385.03	0.179905	-11.6461	2.40273e-31	1.06441e-28	10.996	13.0914	12.7568	12.5314	11.6736	11.5747	12127	5501	2767	1686	99.5758	66.0451	20.7062	15.0022	198.864	130.993	41.0485	30.1338
gene-NCU05133	rna-XM_951538.3	protein_coding	3872797	.	.	XP_956631.1	udp-glucose 4-epimerase	-2.11892	10337.2	0.143475	-7.55066	4.33049e-14	2.64129e-12	12.6945	13.7778	13.5482	13.5157	12.9963	12.9858	17554	10020	8321	5952	59.9309	50.0328	25.8911	22.048	119.688	99.2342	51.3272	44.2862
gene-NCU05134	rna-XM_951539.3	protein_coding	3872798	.	.	XP_956632.3	hypothetical protein	-2.59585	8446.02	0.167184	-8.2317	1.84579e-16	1.67054e-14	12.1976	13.574	13.3336	13.1962	12.6414	12.5197	16210	8123	6416	3840	244.437	179.151	88.1868	62.8282	488.167	355.325	174.824	126.198
gene-NCU05136	rna-XM_951541.3	protein_coding	3872800	.	.	XP_956634.1	endo alpha-1,4 polygalactosaminidase precursor	-2.07952	89950.6	0.155099	-6.81019	9.74675e-12	4.12253e-10	15.8341	16.8904	16.5728	16.7215	16.0949	16.1429	134756	96820	70079	54818	603.989	634.728	286.291	266.593	1206.23	1258.91	567.552	535.486
gene-NCU05137	rna-XM_951542.3	protein_coding	3872801	ncw-1	.	XP_956635.1	non-anchored cell wall protein 1	-2.14828	50539.2	0.174405	-6.32541	2.52563e-10	8.40245e-09	14.9706	16.0737	15.7163	15.9166	15.1987	15.3316	73795	56584	35917	32016	236.192	264.893	104.778	111.185	471.702	525.385	207.715	223.33
gene-NCU05138	rna-XM_951543.2	protein_coding	3872802	.	.	XP_956636.1	hypothetical protein	-4.27272	1525.37	0.181953	-11.5148	1.11113e-30	4.45352e-28	9.17855	11.271	10.8245	10.8246	9.76656	9.8948	3023	1802	637	586	21.3991	18.6529	4.10574	4.50018	42.7362	36.9958	8.13934	9.03918
gene-NCU05153	rna-XM_951558.2	protein_coding	3872789	.	.	XP_956651.1	carbohydrate O-acetyltransferase	-2.08455	1469.8	0.178487	-5.93734	2.8969e-09	8.15491e-08	9.89757	10.9555	10.7282	10.6855	10.1315	10.2563	2498	1407	1070	949	13.1667	10.8464	5.1417	5.42602	26.2954	21.5125	10.193	10.8988
gene-NCU05155	rna-XM_951560.1	protein_coding	3872791	.	.	XP_956653.1	hypothetical protein	5.53371	11.0433	1.17783	2.09558	0.0361191	NA	4.21134	1.83282	3.31339	3.36641	3.56559	3.43525	2	4	31	11	0.01578	0.063979	0.392382	0.154549	0.031515	0.126895	0.77787	0.31043
gene-NCU05202	rna-XM_957108.2	protein_coding	3878340	.	.	XP_962201.1	hypothetical protein	-2.67227	5518.17	0.217439	-6.52166	6.95353e-11	2.50119e-09	11.5532	12.9714	12.8038	12.4644	12.0443	11.8317	11892	4626	4378	2258	78.5812	44.706	26.3645	16.1848	156.935	88.6692	52.2656	32.5092
gene-NCU05209	rna-XM_957115.2	protein_coding	3878347	.	.	XP_962208.1	hypothetical protein	-3.37699	1133.25	0.185608	-9.45938	3.09774e-21	4.65601e-19	9.01469	10.7725	10.3088	10.4502	9.5709	9.53699	1949	1389	665	453	19.8087	20.6488	6.15374	4.99104	39.5602	40.9546	12.1993	10.0251
gene-NCU05230	rna-XM_956797.2	protein_coding	3878029	.	.	XP_961890.1	hypothetical protein	-2.12288	316.27	0.289215	-3.75506	0.0001733	0.00153705	7.66117	8.74861	8.57687	8.33341	8.10821	7.88516	618	259	306	144	5.28292	3.23427	2.38239	1.33192	10.5506	6.41481	4.72291	2.67533
gene-NCU05237	rna-XM_956908.2	protein_coding	3878149	.	.	XP_962001.1	hypothetical protein	-2.04078	5705.5	0.174965	-5.88189	4.05602e-09	1.09773e-07	11.8738	12.9028	12.7622	12.5559	12.1952	12.107	10610	4845	4990	3167	69.6855	46.5415	29.8697	22.5654	139.17	92.3098	59.2146	45.3254
gene-NCU05277	rna-XM_956821.1	protein_coding	3878067	.	.	XP_961914.1	hypothetical protein	-3.65979	5130.63	0.152463	-12.2768	1.20712e-34	6.3502e-32	11.1047	12.9764	12.6185	12.5343	11.6732	11.6448	10372	5571	2810	1944	302.618	237.737	74.7279	61.5398	604.36	471.525	148.143	123.61
gene-NCU05309	rna-XM_956829.2	protein_coding	3878074	.	.	XP_961922.1	Cut9 interacting protein Scn1	-4.8254	6044.45	0.15476	-14.6721	9.73109e-49	2.04766e-45	11.0189	13.2897	12.8705	12.7713	11.7392	11.6917	12984	6865	2697	1796	91.6597	70.8861	17.351	13.7571	183.054	140.594	34.3971	27.6329
gene-NCU05338	rna-XM_958177.3	protein_coding	3879418	.	.	XP_963270.2	hypothetical protein	-2.2052	5078.58	0.148163	-7.70036	1.35683e-14	8.99247e-13	11.6298	12.7707	12.5288	12.4947	11.9571	11.9342	8741	4981	4017	2817	28.1384	23.4545	11.7874	9.83713	56.1953	46.5193	23.3677	19.7591
gene-NCU05340	rna-XM_958179.2	protein_coding	3879420	.	.	XP_963272.1	alkanesulfonate monooxygenase	2.6069	233.232	0.271957	5.08293	3.71661e-07	6.50368e-06	8.39795	7.01291	7.51638	7.4861	8.07505	8.01735	165	90	437	293	0.629945	0.502504	1.52377	1.21536	1.25807	0.996658	3.02076	2.4412
gene-NCU05349	rna-XM_011395261.1	protein_coding	23568439	.	.	XP_011393563.1	hypothetical protein	-9.57894	964.175	0.212115	-15.3684	2.66796e-53	7.48541e-50	7.51286	10.7696	10.2555	10.0046	8.68329	8.71367	2448	1087	221	170	9.7544	6.33185	0.801402	0.73446	19.4806	12.5585	1.58872	1.47525
gene-NCU05351	rna-XM_958249.3	protein_coding	3879482	.	.	XP_963342.2	hypothetical protein	-3.78229	2247.44	0.193976	-9.89433	4.40571e-23	8.42793e-21	9.87519	11.7959	11.4479	11.31	10.5403	10.3589	4719	2373	1358	713	55.6604	40.931	14.6008	9.11653	111.16	81.1818	28.945	18.3117
gene-NCU05499	rna-XM_955368.2	protein_coding	3876615	.	.	XP_960461.1	homogentisate 1,2-dioxygenase	2.22744	1065.7	0.189892	6.08444	1.16898e-09	3.5647e-08	10.5227	9.36692	9.6907	9.71322	10.1642	10.3298	795	489	1632	1477	5.06977	4.55925	9.48932	10.2202	10.1249	9.04274	18.8119	20.5285
gene-NCU05524	rna-XM_955393.3	protein_coding	3876608	.	.	XP_960486.3	hypothetical protein	-2.0864	401.108	0.228607	-4.6412	3.46391e-06	4.85929e-05	8.01959	9.08405	8.76011	8.86692	8.36799	8.33344	613	426	334	227	2.60896	2.65156	1.29516	1.04829	5.21037	5.25907	2.56756	2.10562
gene-NCU05525	rna-XM_955394.2	protein_coding	3876609	.	.	XP_960487.1	DUF833 domain-containing protein	-2.66515	12188.3	0.153899	-9.18928	3.95462e-20	5.36872e-18	12.6993	14.1136	13.8482	13.7517	13.1346	13.0569	23005	12139	8795	5647	218.804	168.87	76.2408	58.2752	436.975	334.934	151.142	117.053
gene-NCU05534	rna-XM_955403.3	protein_coding	3876643	.	.	XP_960496.1	hypothetical protein	-2.9833	2416.23	0.183722	-8.58313	9.23237e-18	9.47669e-16	10.2437	11.8218	11.5144	11.4268	10.7841	10.6146	4673	2494	1725	941	41.6508	32.5193	14.0153	9.09756	83.181	64.4982	27.7843	18.2736
gene-NCU05624	rna-XM_955075.2	protein_coding	3876317	.	.	XP_960168.1	L-asparaginase	2.95634	394.103	0.242644	6.44489	1.15686e-10	4.07418e-09	9.19961	7.64553	8.08689	8.22607	8.87768	8.77536	213	165	782	496	1.49895	1.6939	5.02101	3.79154	2.99356	3.35965	9.95379	7.61579
gene-NCU05625	rna-XM_955076.2	protein_coding	3876318	.	.	XP_960169.2	hypothetical protein	2.11597	1721.74	0.16959	6.37611	1.81647e-10	6.18997e-09	11.1907	10.1112	10.3669	10.4622	10.9309	10.9486	1253	866	2876	2141	9.92385	10.0344	20.7753	18.4076	19.819	19.9022	41.1856	36.9739
gene-NCU05627	rna-XM_955078.3	protein_coding	3876320	.	.	XP_960171.3	high affinity glucose transporter ght1	2.28575	2147.29	0.16043	7.43418	1.05221e-13	5.90432e-12	11.5444	10.3528	10.6639	10.7168	11.2792	11.265	1535	992	3752	2680	9.11638	8.6124	20.3188	17.2764	18.2064	17.0817	40.2806	34.7018
gene-NCU05638	rna-XM_955106.3	protein_coding	3876357	stk-34	.	XP_960199.1	serine/threonine protein kinase-34	-2.22161	15852.7	0.163742	-7.03302	2.0211e-12	9.66566e-11	13.2647	14.4162	14.2414	14.0601	13.6095	13.5469	29830	14107	12848	8478	113.881	78.7718	44.7067	35.1165	227.433	156.235	88.6279	70.5359
gene-NCU05649	rna-XM_955117.1	protein_coding	3876348	.	.	XP_960210.1	RTA1 domain-containing protein	-2.96147	473.314	0.253895	-6.16913	6.86664e-10	2.1728e-08	7.8976	9.46795	9.16882	9.0121	8.50344	8.28608	956	463	360	170	11.0292	7.81	3.77732	2.1277	22.0265	15.4902	7.48826	4.27376
gene-NCU05664	rna-XM_957676.2	protein_coding	3878917	.	.	XP_962769.1	hypothetical protein	-2.02059	3863.3	0.157743	-6.43312	1.25014e-10	4.36614e-09	11.3211	12.3354	12.1572	12.0422	11.6021	11.5961	6795	3487	3201	2305	20.7267	15.5532	8.89743	7.62704	41.3935	30.848	17.6385	15.3199
gene-NCU05667	rna-XM_957679.3	protein_coding	3878920	acw-3	.	XP_962772.1	anchored cell wall protein 3	-3.27781	48437.2	0.166489	-10.2873	8.03627e-25	1.87893e-22	14.467	16.1797	15.7083	15.9028	14.9135	14.999	80148	60462	26212	21944	331.549	365.828	98.83	98.4933	662.14	725.578	195.923	197.836
gene-NCU05693	rna-XM_957962.3	protein_coding	3879204	.	.	XP_963055.3	interferon-induced GTP-binding protein Mx2	-2.62609	13615.5	0.146733	-9.49286	2.24776e-21	3.56969e-19	12.8746	14.2675	13.9964	13.9217	13.2829	13.2476	25271	13698	9614	6607	133.706	106.001	46.3631	37.9297	267.025	210.242	91.9115	76.1866
gene-NCU05694	rna-XM_957963.2	protein_coding	3879205	.	.	XP_963056.1	hypothetical protein	-3.19153	3116.89	0.256181	-6.53541	6.34361e-11	2.30147e-09	10.5381	12.2128	12.0254	11.5925	11.1482	10.8447	7337	2551	2319	1006	29.4326	14.9677	8.47936	4.37785	58.7801	29.6867	16.8097	8.79346
gene-NCU05755	rna-XM_954637.2	protein_coding	3875892	.	.	XP_959730.1	hypothetical protein	-2.50884	670.065	0.22841	-5.8098	6.25473e-09	1.63497e-07	8.5753	9.90493	9.64968	9.52149	9.07455	8.8684	1272	640	562	282	17.3304	12.7584	6.97806	4.16952	34.6106	25.3048	13.8335	8.37501
gene-NCU05761	rna-XM_954643.3	protein_coding	3875874	.	.	XP_959736.3	hypothetical protein	2.57468	5493.74	0.152919	8.92236	4.56454e-19	5.41123e-17	12.9503	11.5855	11.9971	11.9434	12.6831	12.6087	3927	2141	10312	6832	42.4244	33.8242	101.543	80.0806	84.726	67.0863	201.302	160.852
gene-NCU05762	rna-XM_954644.2	protein_coding	3875875	.	.	XP_959737.2	hypothetical protein	2.96342	3798.42	0.158911	9.86253	6.05066e-23	1.10714e-20	12.4719	10.9039	11.3896	11.3244	12.1702	12.0832	2475	1319	7454	4866	22.7446	17.7303	62.4499	48.5339	45.4235	35.166	123.802	97.4865
gene-NCU05763	rna-XM_954645.2	protein_coding	3875876	.	.	XP_959738.2	hypothetical protein	2.87353	2615.5	0.182162	8.35969	6.28816e-17	5.8162e-15	11.9222	10.3988	10.8718	10.8044	11.6854	11.4679	1748	927	5486	3038	47.2344	36.6264	135.119	89.0719	94.3321	72.6443	267.864	178.912
gene-NCU05764	rna-XM_954646.3	protein_coding	3875877	.	.	XP_959739.2	hypothetical protein	3.16684	3804.33	0.162618	10.2267	1.50587e-24	3.42565e-22	12.4971	10.8357	11.2621	11.3752	12.1267	12.1435	2028	1456	7122	5289	20.8827	21.9303	66.8434	59.0851	41.705	43.4962	132.512	118.68
gene-NCU05766	rna-XM_954648.3	protein_coding	3875879	.	.	XP_959741.2	hypothetical protein	2.62713	11538.6	0.150641	9.25036	2.23741e-20	3.08726e-18	14.0289	12.6352	13.0616	12.9902	13.7545	13.6858	8235	4369	21702	14486	76.5114	59.3711	183.791	146.038	152.801	117.756	364.352	293.337
gene-NCU05767	rna-XM_954649.1	protein_coding	3875880	.	.	XP_959742.1	PRO1A C6 Zink-finger protein	2.44554	2367.92	0.190203	6.78305	1.17664e-11	4.90286e-10	11.7141	10.4263	10.6862	10.883	11.3627	11.4738	1420	1160	3887	3257	8.64476	10.3321	21.5773	21.5258	17.2645	20.4926	42.7755	43.2372
gene-NCU05768	rna-XM_954650.2	protein_coding	3875881	poi-2	.	XP_959743.1	mating response protein POI2	2.56723	68007.3	0.153367	8.86897	7.38286e-19	8.51254e-17	16.5788	15.2186	15.6099	15.5828	16.3485	16.2011	47688	27180	133035	80503	541.381	451.327	1376.6	991.637	1081.2	895.155	2729	1991.83
gene-NCU05878	rna-XM_954776.2	protein_coding	3876001	.	.	XP_959869.2	hypothetical protein	-2.14239	7466.14	0.148588	-7.39779	1.38471e-13	7.51944e-12	12.2143	13.3135	13.0909	13.0359	12.54	12.4915	12901	7157	6139	4140	57.5004	46.6589	24.9369	20.02	114.835	92.5426	49.4356	40.2127
gene-NCU05881	rna-XM_954779.3	protein_coding	3876004	.	.	XP_959872.1	DUF500 and UBA/TS-N domain-containing protein	-2.6728	18154.3	0.186806	-7.59264	3.13457e-14	1.96893e-12	13.2712	14.6895	14.2378	14.4914	13.588	13.7339	27290	22260	10885	9985	114.099	136.128	41.4809	45.2984	227.869	269.993	82.2329	90.9875
gene-NCU05899	rna-XM_954364.2	protein_coding	3875604	.	.	XP_959457.1	flotillin domain-containing protein	-2.08805	10338.1	0.142728	-7.44183	9.9298e-14	5.60934e-12	12.709	13.7711	13.5296	13.53	12.9936	13.0048	17114	10187	8266	6113	76.1979	66.3388	33.5427	29.5274	152.175	131.575	66.496	59.3096
gene-NCU05931	rna-XM_953033.3	protein_coding	3874273	.	.	XP_958126.1	hypothetical protein	-3.15724	1407.61	0.182257	-9.10066	8.97857e-20	1.12795e-17	9.40362	11.062	10.7682	10.6112	9.92641	9.87551	2874	1405	882	585	11.289	8.06996	3.15705	2.49287	22.5454	16.0058	6.25862	5.00725
gene-NCU05956	rna-XM_953477.3	protein_coding	3874724	gh2-2	.	XP_958570.3	beta-galactosidase	2.42369	1817.09	0.164714	7.75408	8.89847e-15	6.18995e-13	11.3287	10.0528	10.3959	10.4424	11.064	11.0115	1253	802	3309	2251	3.98852	3.73528	9.60626	7.77892	7.96551	7.4085	19.0437	15.6249
gene-NCU05974	rna-XM_953534.2	protein_coding	3874774	.	.	XP_958627.1	cell wall glucanosyltransferase Mwg1	-2.15224	13178	0.142976	-7.73443	1.03864e-14	7.10748e-13	13.0295	14.1353	13.8909	13.8794	13.3154	13.349	22194	13013	10142	7765	114.518	98.2065	47.6953	43.4695	228.704	194.781	94.5526	87.314
gene-NCU05977	rna-XM_953537.2	protein_coding	3874777	.	.	XP_958630.1	dihydrodipicolinate synthase	2.14207	1385.07	0.180959	6.07322	1.25367e-09	3.72868e-08	10.8822	9.78585	10.031	10.1599	10.6021	10.6484	970	709	2278	1761	6.00316	6.41999	12.8583	11.8324	11.989	12.7333	25.4907	23.7669
gene-NCU05985	rna-XM_953545.2	protein_coding	3874785	.	.	XP_958638.1	glycerol-3-phosphate O-acyltransferase	-2.2897	8308.73	0.15485	-7.71813	1.18047e-14	7.94881e-13	12.3024	13.4977	13.1625	13.2893	12.6156	12.6484	13029	9100	6129	4689	44.8488	45.8166	19.2296	17.5138	89.5678	90.8718	38.1212	35.1786
gene-NCU05990	rna-XM_011396685.1,rna-XM_011396686.1,rna-XM_011396687.1	protein_coding	3874945	.	.	XP_011394988.1; XP_011394989.1; XP_011394987.1	cell surface receptor/MFS transporter, variant 1, cell surface receptor/MFS transporter, variant 2	2.16987	2015.84	0.185676	6.01911	1.75379e-09	5.05535e-08	11.4313	10.3108	10.7149	10.5253	11.1662	11.1763	1791	785	3415	2517	6.92599	4.47362	12.0411	10.5464	13.8319	8.87292	23.8705	21.1837
gene-NCU06111	rna-XM_954880.2	protein_coding	3876111	.	.	XP_959973.1	GTPase Ras2p	-2.46893	3178.34	0.160963	-8.10051	5.47306e-16	4.60667e-14	10.8394	12.1435	11.7897	11.9055	11.1904	11.225	5133	3538	2219	1704	27.3847	27.6081	10.7876	9.86112	54.6902	54.7574	21.3857	19.8073
gene-NCU06114	rna-XM_954883.2	protein_coding	3876114	.	.	XP_959976.1	hypothetical protein	-3.50042	10470.8	0.144161	-12.5382	4.61296e-36	2.98671e-33	12.184	13.9916	13.583	13.6283	12.7146	12.7103	19394	12193	5816	4196	246.844	226.995	67.4731	57.9498	492.973	450.218	133.761	116.399
gene-NCU06117	rna-XM_954886.2	protein_coding	3876133	.	.	XP_959979.2	hypothetical protein	-2.18064	2221.2	0.162582	-6.91803	4.57968e-12	2.05038e-10	10.4484	11.5723	11.3205	11.3064	10.7233	10.8028	3761	2199	1631	1344	13.7094	11.7245	5.41986	5.31358	27.3792	23.2543	10.7445	10.673
gene-NCU06130	rna-XM_954899.3	protein_coding	3876146	.	.	XP_959992.1	hypothetical protein	-2.25568	3887.83	0.151601	-7.74111	9.85505e-15	6.79918e-13	11.2218	12.3953	12.1078	12.1498	11.5322	11.5654	6419	4030	2897	2218	36.1957	33.236	14.8897	13.5661	72.2867	65.9197	29.5177	27.2493
gene-NCU06137	rna-XM_954906.2	protein_coding	3876121	.	.	XP_959999.1	cytochrome P450 55A2	-4.85688	35.1894	0.723584	-3.15103	0.00162698	0.010159	3.62654	5.85868	5.30866	5.08748	4.73596	4.90111	90	31	6	18	0.616844	0.30422	0.037878	0.130734	1.2319	0.603386	0.075091	0.262596
gene-NCU06186	rna-XM_957905.3	protein_coding	3879146	.	.	XP_962998.2	hypothetical protein	-2.1825	3324.9	0.161074	-6.99046	2.73995e-12	1.28839e-10	11.0288	12.155	11.9319	11.8613	11.3846	11.2964	5835	3173	2782	1760	14.3622	11.4218	6.23984	4.70014	28.6829	22.6539	12.37	9.44082
gene-NCU06245	rna-XM_958003.3	protein_coding	3879219	plc-1	.	XP_963096.3	phospholipase C	-2.00179	6993.9	0.183253	-5.464	4.65528e-08	1.02307e-06	12.1862	13.1873	13.0676	12.8256	12.5086	12.3963	13181	5748	6300	3857	49.8013	31.7618	21.696	15.8111	99.4586	62.9958	43.0107	31.7586
gene-NCU06252	rna-XM_957763.2	protein_coding	3879009	.	.	XP_962856.1	hypothetical protein	-2.39973	5758.41	0.159889	-7.8984	2.82511e-15	2.08587e-13	11.7264	12.9888	12.6984	12.7112	12.0146	12.1376	9871	5970	3811	3364	27.2774	24.1305	9.59916	10.0866	54.476	47.86	19.0297	20.2603
gene-NCU06266	rna-XM_957777.2	protein_coding	3879023	.	.	XP_962870.1	histone-lysine N-methyltransferase	-2.08695	998.913	0.244105	-4.3481	1.37319e-05	0.000167267	9.3374	10.3997	10.2581	10.0034	9.76532	9.48071	1930	820	992	450	8.61132	5.35229	4.03358	2.17722	17.1977	10.6157	7.99629	4.37323
gene-NCU06417	rna-XM_952215.2	protein_coding	3873455	.	.	XP_957308.1	uracil-5-carboxylate decarboxylase	2.48963	2091.18	0.16352	8.04754	8.44766e-16	6.83692e-14	11.5427	10.2276	10.5774	10.6317	11.2127	11.2763	1405	911	3563	2811	9.84958	9.34059	22.7625	21.3754	19.6707	18.526	45.1251	42.9352
gene-NCU06523	rna-XM_956702.2	protein_coding	3877943	gh13-4	.	XP_961795.1	alpha-glucosidase	2.34254	144.766	0.32585	3.76884	0.000164008	0.00146235	7.66656	6.43231	6.92406	6.87089	7.34094	7.31823	114	58	257	181	0.598193	0.442535	1.22741	1.02989	1.19466	0.877718	2.43325	2.06867
gene-NCU06555	rna-XM_957169.2	protein_coding	3878420	.	.	XP_962262.1	hypothetical protein	-3.21934	85.4223	0.440957	-3.82524	0.000130646	0.00120973	5.32776	7.02992	6.395	6.66235	6.08365	6.02413	120	119	56	32	1.71768	2.48391	0.72539	0.484853	3.43039	4.92655	1.43803	0.973888
gene-NCU06582	rna-XM_956849.2	protein_coding	3878090	.	.	XP_961942.2	hypothetical protein	-2.81128	914.42	0.234323	-6.36398	1.96588e-10	6.67209e-09	8.90548	10.398	10.1696	9.91434	9.45126	9.23659	1921	823	710	352	11.8987	7.45441	4.00382	2.35949	23.7629	14.785	7.93729	4.73934
gene-NCU06726	rna-XM_955813.2	protein_coding	3877044	.	.	XP_960906.2	nitrilase	2.40725	242.895	0.2696	4.70097	2.58927e-06	3.74465e-05	8.42433	7.15231	7.62217	7.56084	8.12993	8.06654	187	96	447	297	1.71969	1.29479	3.75792	2.97004	3.43441	2.56807	7.44981	5.9657
gene-NCU06747	rna-XM_958426.2	protein_coding	3879680	.	.	XP_963519.1	hypothetical protein	-2.41532	15080.5	0.188873	-6.73583	1.62994e-11	6.59577e-10	13.1083	14.3806	14.201	13.9702	13.5403	13.3625	29875	13303	12520	6886	208.83	136.014	79.7707	52.2279	417.056	269.769	158.14	104.906
gene-NCU06756	rna-XM_011395283.1,rna-XM_011395284.1	protein_coding	3879689	.	.	XP_011393586.1; XP_011393585.1	ubiquitin-protein ligase, variant	-2.08263	2144.23	0.159608	-6.63128	3.3278e-11	1.26171e-09	10.4425	11.5003	11.2756	11.2346	10.7212	10.7552	3640	2055	1687	1293	8.66434	7.17584	3.67426	3.18254	17.3036	14.2325	7.28395	6.39253
gene-NCU06912	rna-XM_954166.3	protein_coding	3875399	.	.	XP_959259.2	hypothetical protein	-2.07982	13208.6	0.142309	-7.42369	1.13904e-13	6.30746e-12	13.0663	14.1228	13.8701	13.8955	13.3485	13.3602	21490	13206	10585	7834	167.147	150.235	75.0402	66.1092	333.811	297.973	148.762	132.789
gene-NCU06915	rna-XM_954169.2	protein_coding	3875370	.	.	XP_959262.1	hypothetical protein	2.98002	154.961	0.369661	4.26154	2.03026e-05	0.000237014	7.86099	6.27496	6.94676	6.80588	7.59221	7.25986	114	45	363	157	1.00929	0.575198	2.95029	1.51323	2.01565	1.14084	5.84873	3.03952
gene-NCU06944	rna-XM_011396967.1,rna-XM_011396968.1	protein_coding	3874197	.	.	XP_011395269.1; XP_011395270.1	hypothetical protein, uncharacterized protein	-2.1174	2115.71	0.180345	-6.00122	1.95836e-09	5.60662e-08	10.407	11.4887	11.3277	11.1358	10.7388	10.6755	3953	1835	1776	1167	8.51612	5.78562	3.49052	2.72746	17.0076	11.4751	6.9197	5.47845
gene-NCU06969	rna-XM_957516.2	protein_coding	3878779	.	.	XP_962609.1	phosphoinositide 3-phosphate phosphatase	-2.40825	3432.42	0.188541	-6.72525	1.75296e-11	6.99272e-10	10.9762	12.2439	12.0712	11.8207	11.3787	11.2763	6876	2976	2714	1674	31.1891	19.7388	11.2202	8.23777	62.2879	39.1497	22.2432	16.5466
gene-NCU06970	rna-XM_011395903.1,rna-XM_011395904.1	protein_coding	3878780	.	.	XP_011394205.1; XP_011394206.1	ribose-phosphate pyrophosphokinase II, variant	-2.3661	29715.5	0.140136	-8.86646	7.55101e-19	8.58876e-17	14.1079	15.3504	15.0776	15.069	14.4447	14.4578	51430	30266	21759	16147	365.769	313.935	141.27	123.844	730.48	622.653	280.057	248.757
gene-NCU06989	rna-XM_957536.3	protein_coding	3878767	.	.	XP_962629.2	hypothetical protein	-2.33602	22478	0.178375	-6.86224	6.77879e-12	2.92601e-10	13.7181	14.9422	14.755	14.5662	14.1284	13.9681	43102	20222	18863	10684	224.799	154.261	89.6677	60.4605	448.948	305.959	177.76	121.443
gene-NCU06991	rna-XM_957538.2	protein_coding	3878769	.	.	XP_962631.2	hypothetical protein	-2.19691	550.192	0.210143	-5.40337	6.54008e-08	1.40071e-06	8.42664	9.5628	9.3232	9.24676	8.8095	8.73307	973	523	458	290	5.4626	4.29073	2.344	1.76202	10.9094	8.51016	4.64681	3.53923
gene-NCU07005	rna-XM_956668.2	protein_coding	3877909	.	.	XP_961761.1	glycosyl hydrolase	-2.38477	464.421	0.234796	-5.34016	9.28641e-08	1.90643e-06	8.09752	9.35522	9.07254	9.02054	8.57267	8.39925	829	461	396	208	4.43856	3.60416	1.92862	1.20525	8.86429	7.14844	3.82334	2.42089
gene-NCU07016	rna-XM_956744.3	protein_coding	3877985	.	.	XP_961837.1	hypothetical protein	-2.029	2891.2	0.172599	-5.91409	3.33725e-09	9.14971e-08	10.8985	11.9194	11.7402	11.6202	11.2376	11.1165	5109	2604	2601	1565	27.0289	20.1446	12.5408	8.98131	53.9796	39.9544	24.8613	18.0401
gene-NCU07017	rna-XM_956745.2	protein_coding	3877986	.	.	XP_961838.2	hypothetical protein	-2.44461	8459.87	0.148841	-8.66427	4.54431e-18	4.78118e-16	12.262	13.5517	13.2236	13.302	12.6045	12.6384	13979	9178	5953	4565	111.012	106.605	43.0879	39.3285	221.704	211.438	85.4186	78.9963
gene-NCU07029	rna-XM_957075.2	protein_coding	3878307	.	.	XP_962168.1	hypothetical protein	-2.7632	31.2864	0.656916	-2.23215	0.0256048	0.092496	4.04582	5.52533	5.0596	5.02035	4.83323	4.75556	59	32	26	11	0.167239	0.132979	0.066407	0.032587	0.333994	0.263749	0.131647	0.065455
gene-NCU07037	rna-XM_957083.2	protein_coding	3878315	.	.	XP_962176.1	hypothetical protein	-2.78456	2617.55	0.175261	-8.43	3.45674e-17	3.3063e-15	10.4331	11.9116	11.6067	11.5559	10.9308	10.7817	4866	2718	1934	1097	21.2105	17.3271	7.68241	5.18669	42.3596	34.3663	15.2298	10.4181
gene-NCU07054	rna-XM_955043.3	protein_coding	3876283	.	.	XP_960136.3	sugar transporter 4	3.20729	72.5659	0.446863	3.76257	0.000168174	0.00149632	6.78654	5.11836	5.8388	5.90844	6.35258	6.27551	38	28	147	93	0.270044	0.288767	0.946736	0.711577	0.539307	0.572737	1.87684	1.42929
gene-NCU07055	rna-XM_955051.2	protein_coding	3876291	.	.	XP_960144.2	monooxygenase	2.94193	54.7844	0.504863	3.08353	0.00204558	0.0122371	6.3519	4.80165	5.51801	5.54653	5.94592	5.83089	33	21	114	65	0.282332	0.255782	0.898678	0.608007	0.563847	0.507314	1.78156	1.22126
gene-NCU07063	rna-XM_955235.2	protein_coding	3876477	.	.	XP_960328.1	hypothetical protein	-3.04635	12752	0.165426	-9.71483	2.60692e-22	4.43974e-20	12.6218	14.2289	13.9625	13.7868	13.1207	13.0368	26043	12481	8387	5314	150.878	105.756	44.2868	33.3995	301.32	209.755	87.7953	67.0871
gene-NCU07095	rna-XM_955163.2	protein_coding	3876419	.	.	XP_960256.1	hypothetical protein	-4.45124	68.1272	0.485209	-4.43975	9.00636e-06	0.000113313	4.641	6.79836	6.32405	6.08999	5.70372	5.64857	165	64	36	19	2.13356	1.20454	0.416206	0.257717	4.26096	2.38908	0.825098	0.517658
gene-NCU07121	rna-XM_955211.3	protein_coding	3876451	.	.	XP_960304.3	modin	-2.4391	49429.1	0.140066	-9.18389	4.15812e-20	5.55539e-18	14.811	16.0974	15.7956	15.8277	15.1699	15.1653	84133	52096	35921	25928	310.12	280.874	120.684	103.698	619.343	557.081	239.247	208.29
gene-NCU07124	rna-XM_955214.2	protein_coding	3876454	.	.	XP_960307.2	hypothetical protein	-3.64145	23.7064	0.774683	-2.40681	0.0160927	0.0651526	3.37747	5.21025	4.66982	4.57369	4.33003	4.42078	52	23	8	13	0.3476	0.215998	0.048469	0.092834	0.694194	0.428407	0.096086	0.186469
gene-NCU07129	rna-XM_955219.2	protein_coding	3876461	.	.	XP_960312.2	amino-acid permease inda1	-2.0378	54829.3	0.153597	-6.68641	2.28714e-11	8.91241e-10	15.1396	16.1666	15.8692	15.9918	15.3805	15.4511	83060	57757	42535	34432	298.513	303.612	139.334	134.269	596.162	602.179	276.219	269.696
gene-NCU07159	rna-XM_952291.2	protein_coding	3873522	.	.	XP_957384.1	proteinase T	2.14176	29270.4	0.190578	5.7656	8.13673e-09	2.07536e-07	15.2843	14.1857	14.3608	14.5847	14.9331	15.1208	18935	15884	43809	40401	92.4121	113.387	194.879	213.94	184.557	224.89	386.334	429.726
gene-NCU07194	rna-XM_952326.1	protein_coding	3873562	.	.	XP_957419.1	hypothetical protein	2.48484	83.1349	0.432457	3.0365	0.00239342	0.0139483	6.89152	5.57113	6.16148	6.0908	6.60101	6.39692	66	30	176	87	0.711549	0.46238	1.74434	1.02001	1.42104	0.917078	3.45803	2.04882
gene-NCU07205	rna-XM_952337.2	protein_coding	3873589	nit-10	.	XP_957430.2	nitrate transporter CRNA	2.33657	3223.9	0.152697	8.01842	1.07115e-15	8.42605e-14	12.1407	10.916	11.266	11.2558	11.8456	11.8815	2387	1395	5493	4182	10.0572	8.59375	21.0982	19.1203	20.0853	17.0447	41.8257	38.4055
gene-NCU07232	rna-XM_950793.2	protein_coding	3872033	.	.	XP_955886.2	heat shock protein 30	-2.03223	1118.2	0.175449	-5.83112	5.50578e-09	1.4573e-07	9.52636	10.5498	10.3235	10.2907	9.8412	9.79677	1874	1069	952	643	11.1041	9.25983	5.14167	4.13311	22.1761	18.3658	10.193	8.30188
gene-NCU07239	rna-XM_950806.2	protein_coding	3872046	.	.	XP_955899.1	hypothetical protein	2.15333	199.363	0.287618	3.84736	0.000119396	0.0011216	8.08985	6.98042	7.38991	7.34737	7.83024	7.75651	163	87	358	233	2.37716	1.84492	4.76746	3.68994	4.74743	3.65919	9.45115	7.4117
gene-NCU07257	rna-XM_957018.3	protein_coding	3878277	.	.	XP_962111.2	F-box domain-containing protein	-3.97681	43824.4	0.178235	-11.1741	5.4625e-29	2.0899e-26	14.1042	16.0958	15.777	15.5626	14.7536	14.618	96760	44475	24472	14093	459.611	308.994	105.951	72.6309	917.892	612.855	210.04	145.888
gene-NCU07267	rna-XM_957028.3	protein_coding	3878260	bli-3	.	XP_962121.2	bli-3	2.05953	25711.1	0.143377	7.26974	3.60192e-13	1.87144e-11	15.0791	14.0369	14.2933	14.3455	14.8296	14.8551	19765	12729	42400	31844	211.654	199.372	413.848	369.997	422.695	395.43	820.423	743.185
gene-NCU07269	rna-XM_957030.2	protein_coding	3878262	.	.	XP_962123.2	alpha-1,2-mannosidase	2.15158	1309.07	0.174098	6.34928	2.16325e-10	7.28323e-09	10.8036	9.69831	10.0225	10.0079	10.5905	10.4982	1031	597	2359	1521	4.86606	4.12011	10.1543	7.79355	9.71803	8.17176	20.1302	15.6543
gene-NCU07325	rna-XM_957390.3	protein_coding	3878631	con-10	.	XP_962483.1	conidiation-specific protein con-10	2.0041	9341.33	0.164496	6.09714	1.07982e-09	3.30502e-08	13.6055	12.6023	12.9206	12.823	13.447	13.2963	8182	4192	17010	10200	146.197	109.54	277.027	197.753	291.972	217.26	549.185	397.211
gene-NCU07329	rna-XM_957394.2	protein_coding	3878635	.	.	XP_962487.1	hypothetical protein	2.33913	43.3357	0.556576	2.20271	0.0276153	0.0980337	5.91995	4.70741	5.23279	5.31008	5.50286	5.54403	27	22	71	58	0.182364	0.214455	0.442949	0.433793	0.364201	0.425347	0.878115	0.871327
gene-NCU07448	rna-XM_959542.3	protein_coding	3880775	.	.	XP_964635.3	hypothetical protein	2.22714	232.414	0.271705	4.25165	2.12203e-05	0.000247042	8.32393	7.17375	7.53625	7.59641	8.05399	7.99168	167	111	417	277	1.48057	1.44165	3.37022	2.66179	2.95687	2.85935	6.68122	5.34655
gene-NCU07449	rna-XM_959543.3	protein_coding	3880776	.	.	XP_964636.1	hypothetical protein	2.42006	308963	0.149269	8.54193	1.32e-17	1.32267e-15	18.7381	17.4631	17.8319	17.7971	18.5125	18.3922	227235	128044	585303	366113	3780.76	3116.05	8876.22	6609.41	7550.58	6180.33	17596.5	13275.8
gene-NCU07473	rna-XM_958659.2	protein_coding	3879901	.	.	XP_963752.1	glycosyltransferase family 28 domain-containing protein	-2.07652	2738.69	0.17999	-5.85681	4.71854e-09	1.25683e-07	10.7986	11.8518	11.7116	11.4882	11.0937	11.0819	5174	2307	2239	1597	13.4485	8.77044	5.30316	4.5031	26.8581	17.3952	10.5131	9.04505
gene-NCU07532	rna-XM_953952.2	protein_coding	3875183	.	.	XP_959045.1	hypothetical protein	-2.02432	2169.27	0.179237	-5.6765	1.3748e-08	3.33477e-07	10.4862	11.5039	11.1773	11.3457	10.7191	10.8126	3167	2347	1656	1393	23.2932	25.2458	11.0971	11.1112	46.519	50.0721	21.9992	22.3182
gene-NCU07541	rna-XM_953961.2	protein_coding	3875192	.	.	XP_959054.2	hypothetical protein	-2.00266	220.051	0.279158	-3.58907	0.000331861	0.00270666	7.19715	8.19652	7.98899	7.85984	7.54437	7.51934	394	193	188	129	2.86083	2.04884	1.24206	1.01096	5.71339	4.06364	2.4623	2.03064
gene-NCU07569	rna-XM_953521.3	protein_coding	3874761	.	.	XP_958614.3	hypothetical protein	-2.68741	26385.3	0.141752	-10.0614	8.18679e-24	1.76688e-21	13.8048	15.2311	14.8947	14.9401	14.1985	14.2126	45768	28804	17620	13100	368.556	339.265	129.324	114.46	736.045	672.893	256.376	229.908
gene-NCU07607	rna-XM_957748.3	protein_coding	3878995	.	.	XP_962841.3	sugar transporter	2.78255	1547.59	0.167003	8.84062	9.519e-19	1.05423e-16	11.1531	9.67571	10.1294	10.0947	10.8339	10.8091	1033	577	2879	2030	5.79068	4.73048	14.7151	12.3476	11.5646	9.38236	29.1716	24.8017
gene-NCU07617	rna-XM_957758.2	protein_coding	3878990	acon-3	.	XP_962851.2	Acr1	2.00201	170.66	0.305859	3.27421	0.00105958	0.00714053	7.83019	6.82969	7.16141	7.20259	7.50187	7.601	134	86	260	223	0.737433	0.689347	1.30284	1.32921	1.47273	1.36724	2.58279	2.66988
gene-NCU07675	rna-XM_957224.3	protein_coding	3878456	.	.	XP_962317.3	hypothetical protein	-2.49129	6597.66	0.166763	-7.89677	2.8623e-15	2.09496e-13	11.884	13.2009	12.9843	12.8197	12.2933	12.2067	12716	6153	5030	3186	34.7174	24.5697	12.5177	9.43802	69.3343	48.7312	24.8153	18.9575
gene-NCU07684	rna-XM_957233.2	protein_coding	3878465	.	.	XP_962326.1	hypothetical protein	2.22671	824.042	0.218845	5.27733	1.31082e-07	2.57522e-06	10.1528	8.99333	9.4248	9.23225	9.94876	9.79604	727	310	1560	927	4.06896	2.5342	7.9563	5.62723	8.12615	5.0263	15.7728	11.303
gene-NCU07714	rna-XM_957207.2	protein_coding	3878448	.	.	XP_962300.1	hypothetical protein	-2.03098	292.464	0.25681	-3.9803	6.88284e-05	0.000696309	7.5927	8.61433	8.29245	8.39597	7.8686	7.96882	442	308	218	191	2.06641	2.10552	0.926589	0.969214	4.12685	4.17605	1.8369	1.94679
gene-NCU07769	rna-XM_953170.3	protein_coding	3874401	.	.	XP_958263.3	hypothetical protein	-3.10444	9738.05	0.178375	-9.16233	5.07908e-20	6.67979e-18	12.2122	13.8466	13.5952	13.3708	12.7327	12.6202	20512	9259	6455	3898	99.1837	65.4864	28.4474	20.4483	198.08	129.885	56.3949	41.0731
gene-NCU07774	rna-XM_953602.3	protein_coding	3874842	gch-1	.	XP_958695.3	GTP cyclohydrolase 1	-2.30662	1595.09	0.188997	-6.37987	1.77238e-10	6.08903e-09	9.91524	11.1193	10.8237	10.8557	10.1612	10.3444	2666	1655	1025	1003	15.0357	13.6555	5.26953	6.13935	30.0279	27.0841	10.4465	12.3317
gene-NCU07787	rna-XM_953615.3	protein_coding	3874855	ccg-14	.	XP_958708.1	clock controlled protein CCG-14	-3.02879	27027	0.144643	-11.053	2.1203e-28	7.75939e-26	13.7118	15.3105	14.9934	14.934	14.1895	14.1458	51575	28522	17301	11713	284.598	230.2	87.0145	70.127	568.373	456.576	172.5	140.859
gene-NCU07802	rna-XM_953295.2	protein_coding	3874535	.	.	XP_958388.1	hypothetical protein	-2.8558	31251.1	0.145761	-10.3861	2.86721e-25	7.31313e-23	13.9846	15.4985	15.204	15.1309	14.4356	14.3895	59240	32201	20932	14130	349.911	278.201	112.692	90.5553	698.81	551.779	223.405	181.892
gene-NCU07823	rna-XM_957851.2	protein_coding	3879092	.	.	XP_962944.1	scytalone dehydratase	-2.02695	5665.08	0.15214	-6.69982	2.08676e-11	8.20758e-10	11.8698	12.8894	12.6065	12.702	12.1439	12.1525	8721	5866	4630	3410	125.999	123.958	60.9647	53.4557	251.633	245.857	120.858	107.372
gene-NCU07840	rna-XM_957628.2	protein_coding	3878869	.	.	XP_962721.1	hypothetical protein	-3.12299	4925.55	0.174582	-9.41063	4.93184e-21	7.15712e-19	11.2223	12.8653	12.5958	12.4068	11.745	11.6441	10197	4805	3225	1981	46.2167	31.851	13.3208	9.73844	92.2997	63.1729	26.4076	19.5609
gene-NCU07853	rna-XM_958021.3	protein_coding	3879253	.	.	XP_963114.1	uricase	-2.93271	6129.61	0.147602	-10.5163	7.26536e-26	2.03842e-23	11.606	13.1583	12.8331	12.8044	12.0689	12.0334	11392	6542	3995	2739	78.1826	65.6636	24.9859	20.3929	156.139	130.236	49.5327	40.9617
gene-NCU07894	rna-XM_956690.3	protein_coding	3877931	.	.	XP_961783.2	oligopeptide transporter 2	2.91798	4935.79	0.151332	10.2091	1.80465e-24	3.99729e-22	12.8438	11.2992	11.7241	11.7624	12.4743	12.5353	2991	1892	8806	6908	6.54325	6.05182	17.5607	16.3981	13.0676	12.0031	34.8129	32.9376
gene-NCU07963	rna-XM_957003.2	protein_coding	3878235	.	.	XP_962096.1	hypothetical protein	2.06208	202.17	0.315996	3.30416	0.000952601	0.0065352	8.09009	7.04268	7.44828	7.34677	7.92858	7.6606	180	85	409	196	1.3823	0.948636	2.86208	1.63138	2.7606	1.88151	5.67386	3.27683
gene-NCU08016	rna-XM_957593.3	protein_coding	3878852	.	.	XP_962686.3	hypothetical protein	2.31848	60.0776	0.527123	2.3015	0.0213632	0.0806332	6.40161	5.1543	5.80885	5.59841	5.96932	6.05423	62	15	95	84	0.922521	0.313577	1.27931	1.35005	1.84237	0.621944	2.53614	2.71175
gene-NCU08037	rna-XM_957614.3	protein_coding	3878814	.	.	XP_962707.1	hypothetical protein	2.59274	6079.35	0.15884	8.6532	5.0073e-18	5.20327e-16	13.0988	11.7253	12.0514	12.1691	12.786	12.8005	3758	2697	10823	8015	38.0769	39.9708	99.9587	88.1271	76.0437	79.2774	198.161	177.014
gene-NCU08056	rna-XM_960094.2	protein_coding	3881352	.	.	XP_965187.1	ABC drug exporter AtrF	2.1735	1569.87	0.187364	5.97777	2.26208e-09	6.43241e-08	11.0708	9.94947	10.3164	10.2143	10.8913	10.7187	1312	660	2977	1730	2.97681	2.18818	6.15684	4.25953	5.945	4.34	12.2055	8.55581
gene-NCU08073	rna-XM_960111.2	protein_coding	3881384	.	.	XP_965204.1	hypothetical protein	-4.35722	14.2296	0.998261	-2.12711	0.0334111	NA	2.41188	4.53216	3.75447	3.90108	3.63562	3.67017	18	23	5	6	0.131197	0.24838	0.029243	0.040627	0.262015	0.492633	0.057972	0.081604
gene-NCU08100	rna-XM_960138.2	protein_coding	3881364	.	.	XP_965231.1	hypothetical protein	-2.47671	45.5669	0.55618	-2.35252	0.0186466	0.0728298	4.72286	6.01629	5.68889	5.49119	5.29356	5.33855	98	36	30	26	2.22509	1.18648	0.611399	0.619887	4.44375	2.35324	1.21205	1.24512
gene-NCU08156	rna-XM_954555.1	protein_coding	3875804	.	.	XP_959648.1	hypothetical protein	2.0596	98.2584	0.415048	2.51142	0.0120245	0.0518231	7.04418	6.01205	6.37826	6.4329	6.86641	6.56953	74	50	209	87	0.761526	0.751465	1.95863	0.962022	1.52085	1.49044	3.88285	1.93234
gene-NCU08159	rna-XM_954558.3	protein_coding	3875807	.	.	XP_959651.3	hypothetical protein	-3.57221	5396.31	0.153456	-11.9697	5.12397e-33	2.53697e-30	11.2051	13.0416	12.7002	12.5946	11.745	11.7482	10987	5748	2933	2142	38.2018	29.2327	9.2943	8.07788	76.2931	57.9797	18.4253	16.2254
gene-NCU08173	rna-XM_001728017.2	protein_coding	23568483	ecd-2	.	XP_001728069.2	early conidial development-2 protein	2.14597	4734.96	0.160126	6.87977	5.99474e-12	2.62801e-10	12.6569	11.5563	11.7975	11.9175	12.405	12.4062	3346	2397	8034	5852	29.4782	30.8771	64.5152	55.9355	58.8711	61.2411	127.897	112.354
gene-NCU08229	rna-XM_954226.3	protein_coding	3875441	.	.	XP_959319.2	hypothetical protein	-2.89047	55492.6	0.140216	-10.921	9.1482e-28	3.08002e-25	14.8001	16.3314	16.0133	15.9829	15.2425	15.2253	102864	58938	36013	25467	551.985	462.591	176.14	148.277	1102.37	917.497	349.184	297.834
gene-NCU08268	rna-XM_956803.3	protein_coding	3878048	.	.	XP_961896.1	TOR signaling pathway regulator	2.21643	512.3	0.235452	4.87673	1.07857e-06	1.69056e-05	9.4616	8.31986	8.56692	8.75646	9.11693	9.23842	327	271	804	692	2.43056	2.94862	5.453	5.58476	4.85409	5.84825	10.8102	11.2177
gene-NCU08288	rna-XM_956721.2	protein_coding	3877962	.	.	XP_961814.2	hypothetical protein	-2.5283	14598.3	0.154262	-8.67463	4.14887e-18	4.47705e-16	13.0146	14.3527	14.1163	13.9899	13.4138	13.3598	27637	14039	10744	7171	147.844	109.845	52.3856	41.621	295.261	217.864	103.851	83.6011
gene-NCU08407	rna-XM_958186.3	protein_coding	3879434	.	.	XP_963279.2	MFS transporter	2.65103	890.93	0.210108	6.69443	2.16518e-11	8.47641e-10	10.3361	8.93448	9.2611	9.43808	9.94625	10.07	509	410	1479	1265	3.58854	4.21934	9.50199	9.6722	7.1667	8.36857	18.837	19.4278
gene-NCU08491	rna-XM_958327.2	protein_coding	3879585	.	.	XP_963420.1	hypothetical protein	2.31562	1056.02	0.179604	6.74486	1.53174e-11	6.25858e-10	10.5267	9.31483	9.66732	9.67272	10.2023	10.2846	778	465	1737	1408	15.548	13.5979	31.6513	30.5379	31.0511	26.9698	62.7463	61.3393
gene-NCU08530	rna-XM_957919.2	protein_coding	3879179	.	.	XP_963012.2	hypothetical protein	2.11997	148.032	0.329977	3.2852	0.0010191	0.00691198	7.65041	6.5722	6.94414	6.98493	7.42599	7.26469	112	72	283	158	1.65167	1.5491	3.80598	2.53371	3.29856	3.07246	7.54508	5.08927
gene-NCU08641	rna-XM_959756.2	protein_coding	3880982	.	.	XP_964849.1	hypothetical protein	-3.83539	15209.3	0.153651	-12.622	1.59804e-36	1.12089e-33	12.619	14.5584	14.0764	14.2163	13.1782	13.2026	27051	19059	7670	5813	107.343	110.621	27.74	25.0264	214.375	219.405	54.9925	50.2687
gene-NCU08683	rna-XM_956939.3	protein_coding	3878180	rho-2	.	XP_962032.3	RHO family GTPase Rho2	-2.24078	9132.73	0.143394	-8.11748	4.75966e-16	4.08796e-14	12.4605	13.6245	13.3536	13.3707	12.7799	12.7833	15296	9300	7000	5115	73.7259	65.5614	30.7513	26.7483	147.238	130.033	60.9623	53.7273
gene-NCU08715	rna-XM_958483.3	protein_coding	3879730	.	.	XP_963576.3	hypothetical protein	2.13192	12729.3	0.156622	6.97318	3.09854e-12	1.44091e-10	14.0809	12.989	13.2288	13.3407	13.7952	13.8689	9103	6429	20566	16422	31.6045	32.6451	65.0845	61.8645	63.1176	64.7478	129.025	124.263
gene-NCU08716	rna-XM_958484.3	protein_coding	3879731	.	.	XP_963577.3	CND11p	-2.18294	165.648	0.310049	-3.63258	0.000280607	0.00233155	6.69792	7.82958	7.50736	7.52662	7.14604	7.05728	273	169	143	84	2.0685	1.87526	0.985607	0.691763	4.13102	3.71937	1.95389	1.38949
gene-NCU08720	rna-XM_958488.3	protein_coding	3879735	.	.	XP_963581.2	hypothetical protein	-3.57129	32366.2	0.140602	-13.0613	5.47873e-39	5.12383e-36	13.7896	15.6261	15.2217	15.2509	14.3313	14.3194	60828	37491	17809	12690	512.381	461.91	136.731	115.977	1023.28	916.146	271.06	232.954
gene-NCU08771	rna-XM_950999.3	protein_coding	3872239	.	.	XP_956092.2	acetolactate synthase	2.02011	5670.92	0.149969	6.76429	1.33967e-11	5.50047e-10	12.889	11.8751	12.1194	12.184	12.6595	12.6538	4373	2871	9478	6843	19.7514	18.9648	39.0209	33.5397	39.4457	37.6144	77.3561	67.3687
gene-NCU08783	rna-XM_951133.3	protein_coding	3872384	.	.	XP_956226.1	epoxide hydrolase	2.08396	98.3811	0.502001	2.11021	0.0348402	0.117668	7.04531	6.01521	6.13407	6.57391	6.72273	6.69566	34	74	168	117	0.285173	0.918904	1.30087	1.07903	0.569522	1.82254	2.57888	2.16738
gene-NCU08806	rna-XM_956900.3	protein_coding	3878141	.	.	XP_961993.3	hypothetical protein	-2.89791	2913.7	0.153255	-10.016	1.2959e-23	2.66039e-21	10.5459	12.081	11.7383	11.7459	10.9926	10.9903	5278	3172	1866	1350	22.383	19.6769	7.21355	6.21233	44.7013	39.0269	14.3003	12.4782
gene-NCU08901	rna-XM_953746.2	protein_coding	3874986	.	.	XP_958839.2	hypothetical protein	-3.179	2283.21	0.167555	-9.95833	2.31922e-23	4.63192e-21	10.0932	11.7624	11.3252	11.4613	10.5823	10.5894	3892	2746	1353	994	16.6261	17.1575	5.26834	4.60693	33.2042	34.0299	10.4441	9.25359
gene-NCU08907	rna-XM_953583.3	protein_coding	3874830	ccg-13	ncw-7	XP_958676.2	BYS1 domain-containing protein	-2.76102	36131.2	0.139674	-10.4901	9.5913e-26	2.60419e-23	14.2298	15.695	15.3771	15.3718	14.643	14.6427	65171	38516	23931	17388	707.288	611.394	236.721	204.748	1412.53	1212.63	469.283	411.262
gene-NCU08909	rna-XM_953585.3	protein_coding	3874832	gel-3	.	XP_958678.1	beta-1,3-glucanosyltransferase	-2.13345	72548	0.186239	-5.86983	4.36252e-09	1.16941e-07	15.4989	16.5921	16.2107	16.455	15.7067	15.868	102370	83026	50571	47071	500.427	593.636	225.326	249.666	999.406	1177.41	446.692	501.486
gene-NCU08937	rna-XM_955711.1	protein_coding	3876942	.	.	XP_960804.1	hypothetical protein	-2.40591	37.7742	0.599275	-2.11352	0.0345561	0.116905	4.47834	5.73493	5.39743	5.22641	5.07282	5.07476	80	30	28	20	2.70411	1.47405	0.864683	0.711151	5.4004	2.92361	1.71417	1.42844
gene-NCU08967	rna-XM_955696.3	protein_coding	3876939	.	.	XP_960789.2	arrestin domain-containing protein	-2.65026	10460	0.231513	-6.07366	1.25029e-09	3.72868e-08	12.4846	13.8907	13.7464	13.3488	12.9822	12.7329	23138	8364	8547	4162	118.428	62.6134	39.8693	23.1113	236.514	124.186	79.038	46.422
gene-NCU09004	rna-XM_953939.3	protein_coding	3875154	.	.	XP_959032.1	eukaryotic translation initiation factor 6	-2.09285	14584.5	0.144593	-7.36872	1.72273e-13	9.23579e-12	13.2031	14.2687	13.9934	14.059	13.4993	13.4878	23161	14978	11846	8462	171.842	162.54	80.1093	68.122	343.187	322.379	158.811	136.832
gene-NCU09025	rna-XM_953879.2	protein_coding	3875119	.	.	XP_958972.1	glutamyl-tRNA(Gln) amidotransferase	2.00999	477.605	0.218417	4.61131	4.00147e-06	5.51233e-05	9.31761	8.30889	8.6175	8.61642	9.00529	9.12396	390	230	728	626	1.66476	1.43555	2.83131	2.89812	3.32471	2.84724	5.61287	5.82125
gene-NCU09027	rna-XM_953881.2	protein_coding	3875121	.	.	XP_958974.2	MFS transporter	2.34534	710.549	0.192782	6.37921	1.78e-10	6.09034e-09	9.9599	8.7319	9.08349	9.1217	9.68608	9.65234	505	319	1267	882	3.77936	3.48579	8.64362	7.15929	7.54778	6.91366	17.1354	14.3803
gene-NCU09035	rna-XM_953889.3	protein_coding	3875133	.	.	XP_958982.3	alcohol dehydrogenase	2.29409	314.204	0.245567	4.87819	1.07061e-06	1.68122e-05	8.77438	7.5739	7.9762	7.96215	8.42673	8.51449	238	136	510	422	2.22016	1.85832	4.34919	4.28029	4.43391	3.68577	8.62196	8.59749
gene-NCU09041	rna-XM_953895.3	protein_coding	3875139	.	.	XP_958988.2	L-xylulose reductase	2.00848	18607.2	0.160181	6.28106	3.36266e-10	1.10994e-08	14.6006	13.5947	13.7944	13.9319	14.3341	14.4048	13571	9950	29537	23505	104.01	111.538	206.342	195.473	207.719	221.223	409.058	392.633
gene-NCU09079	rna-XM_011394925.1,rna-XM_011394926.1,rna-XM_011394927.1	protein_coding	3881047	.	.	XP_011393229.1; XP_011393227.1; XP_011393228.1	meiotically up-regulated 72 protein, variant 2, meiotically up-regulated 72 protein, variant 1	-2.53309	12583	0.157184	-8.53075	1.45397e-17	1.43977e-15	12.7983	14.1391	13.9094	13.7668	13.1991	13.1436	24057	11975	9259	6165	52.5332	38.44	18.9852	14.6592	104.915	76.2414	37.6367	29.4449
gene-NCU09108	rna-XM_011394935.1,rna-XM_011394936.1	protein_coding	3874465	.	.	XP_011393237.1; XP_011393238.1	uncharacterized protein, hypothetical protein	-2.46536	8850.23	0.162019	-8.03481	9.37215e-16	7.5129e-14	12.3185	13.6203	13.4038	13.2474	12.7145	12.6446	16927	8276	6711	4369	55.1353	39.4318	19.8118	15.4399	110.111	78.2085	39.2754	31.013
gene-NCU09112	rna-XM_953228.3	protein_coding	3874469	.	.	XP_958321.3	hypothetical protein	-2.23565	2496.75	0.155502	-7.46416	8.38301e-14	4.93425e-12	10.5917	11.7525	11.4955	11.4786	10.9256	10.9108	4269	2487	1945	1380	9.56339	8.14591	3.97115	3.35295	19.0991	16.1565	7.87252	6.73482
gene-NCU09117	rna-XM_952939.3	protein_coding	3874179	.	.	XP_958032.1	extracellular cell wall glucanase Crf1	-2.0614	11257.8	0.183423	-5.68973	1.27238e-08	3.11326e-07	12.8444	13.8881	13.7401	13.5434	13.2073	13.033	20881	9666	10373	5774	121.436	82.2218	54.9807	36.4329	242.521	163.077	108.995	73.1801
gene-NCU09123	rna-XM_011394941.1,rna-XM_011394942.1,rna-XM_011394943.1	protein_coding	3875043	camk-1	.	XP_011393245.1; XP_011393244.1; XP_011393243.1	Ca/CaM-dependent kinase-1, variant 2, Ca/CaM-dependent kinase-1, variant 1	-2.1996	64823.3	0.152496	-7.45749	8.81835e-14	5.1189e-12	15.3063	16.4436	16.2244	16.1482	15.665	15.5646	114378	61805	54340	33854	606.63	482.123	263.198	194.04	1211.51	956.235	521.771	389.753
gene-NCU09173	rna-XM_953990.2	protein_coding	3875230	.	.	XP_959083.1	hypothetical protein	2.58078	34.4438	0.666728	2.05152	0.0402161	0.131418	5.64108	4.24668	4.95239	4.89194	5.02709	5.29054	28	11	39	62	0.221385	0.124338	0.278763	0.533753	0.44213	0.246609	0.552628	1.07211
gene-NCU09184	rna-XM_011395692.1	protein_coding	23568504	.	.	XP_011393994.1	indoleamine 2,3-dioxygenase	2.35291	55.7811	0.52387	2.3564	0.018453	0.0722076	6.29213	5.05301	5.63229	5.57644	6.01891	5.76481	46	21	125	51	0.32025	0.214482	0.796415	0.388015	0.639573	0.4254	1.57883	0.779376
gene-NCU09188	rna-XM_954005.3	protein_coding	3875245	.	.	XP_959098.1	hypothetical protein	-2.14218	3780.27	0.16157	-6.80247	1.02843e-11	4.32814e-10	11.2327	12.3315	12.1416	12.0132	11.5593	11.5123	6828	3447	3107	2098	27.2282	20.1021	11.2931	9.0778	54.3777	39.8703	22.3877	18.2339
gene-NCU09209	rna-XM_954060.3	protein_coding	3875305	.	.	XP_959153.3	galactose oxidase	2.01314	46004.6	0.142301	7.09375	1.30527e-12	6.38745e-11	15.9077	14.8982	15.1603	15.1817	15.6485	15.7066	36787	22603	73709	57710	179.537	161.35	327.888	305.604	358.555	320.018	650.014	613.845
gene-NCU09210	rna-XM_954061.3	protein_coding	3875306	.	.	XP_959154.3	dyp-type peroxidase	2.13303	84235	0.141369	7.7309	1.06793e-14	7.24901e-13	16.8075	15.7146	15.9882	16.0356	16.565	16.5565	63461	40588	143570	103282	350.347	327.739	722.435	618.672	699.681	650.033	1432.17	1242.68
gene-NCU09231	rna-XM_958715.3	protein_coding	3879957	.	.	XP_963808.3	DUF1275 domain-containing protein	2.19624	217.03	0.298268	3.80542	0.000141562	0.00129514	8.21626	7.09444	7.38376	7.55766	7.97673	7.85128	138	117	405	244	1.46974	1.82276	3.94187	2.81735	2.93524	3.61523	7.81447	5.659
gene-NCU09245	rna-XM_959587.2	protein_coding	3880829	.	.	XP_964680.1	hypothetical protein	-2.06665	3466.94	0.194736	-5.37803	7.53071e-08	1.5807e-06	11.1427	12.1901	12.0397	11.8405	11.5193	11.3236	6450	2971	3241	1737	28.9379	19.496	13.254	8.45667	57.7921	38.668	26.2752	16.9863
gene-NCU09252	rna-XM_959594.3	protein_coding	3880836	.	.	XP_964687.1	hypothetical protein	-2.05437	2475.05	0.175181	-5.92927	3.04277e-09	8.48045e-08	10.662	11.7012	11.3664	11.5432	10.9186	10.9776	3611	2703	1925	1534	9.03452	9.8916	4.38938	4.1634	18.0429	19.6189	8.70164	8.3627
gene-NCU09319	rna-XM_011394968.1,rna-XM_011394969.1	protein_coding	3880172	.	.	XP_011393270.1; XP_011393271.1	uncharacterized protein, hypothetical protein	-2.04831	3213.61	0.157807	-6.55507	5.56141e-11	2.04412e-09	11.0421	12.0763	11.8822	11.7911	11.3446	11.3099	5597	2962	2697	1857	21.5027	16.6421	9.44342	7.7337	42.9432	33.0076	18.7209	15.5341
gene-NCU09333	rna-XM_958834.3	protein_coding	3880076	.	.	XP_963927.3	zinc finger transcription factor ace1	-2.05866	22585.1	0.144248	-7.22165	5.13587e-13	2.63589e-11	13.8502	14.8919	14.6224	14.6868	14.1175	14.1481	35703	23053	17960	13680	129.898	122.675	59.5581	54.0041	259.421	243.311	118.07	108.474
gene-NCU09352	rna-XM_953838.2	protein_coding	3875078	.	.	XP_958931.1	far upstream element-binding protein 2	-2.31934	3619.01	0.158367	-7.66395	1.80299e-14	1.14968e-12	11.0908	12.3041	12.0134	12.0443	11.3835	11.4746	6069	3757	2521	2116	22.8414	20.6796	8.64613	8.6418	45.6167	41.0157	17.1403	17.3581
gene-NCU09354	rna-XM_011395332.1,rna-XM_011395333.1	protein_coding	3875080	.	.	XP_011393634.1; XP_011393635.1	hypothetical protein, uncharacterized protein	-4.07106	119.218	0.362529	-5.58688	2.31191e-08	5.3607e-07	5.55428	7.58079	7.11122	7.00834	6.42995	6.40459	252	129	62	40	0.997521	0.742471	0.221185	0.166053	1.99216	1.4726	0.438485	0.333539
gene-NCU09355	rna-XM_953841.3	protein_coding	3875081	.	.	XP_958934.1	hypothetical protein	-2.14777	49443.1	0.145584	-7.5753	3.58302e-14	2.21752e-12	14.9391	16.042	15.8051	15.7805	15.2767	15.2009	83905	48384	41386	26787	253.886	214.137	114.14	87.9448	507.038	424.715	226.274	176.648
gene-NCU09372	rna-XM_958650.2	protein_coding	3879892	.	.	XP_963743.2	hypothetical protein	-2.08856	410.883	0.223917	-4.74511	2.08394e-06	3.06652e-05	8.05379	9.11905	8.81885	8.88233	8.40564	8.36429	649	424	344	231	8.74367	8.34252	4.21972	3.37191	17.462	16.5464	8.3653	6.7729
gene-NCU09379	rna-XM_958732.2	protein_coding	3879974	.	.	XP_963825.1	hypothetical protein	-2.29033	261.55	0.257241	-4.64759	3.35834e-06	4.72695e-05	7.31282	8.50822	8.21962	8.17849	7.72149	7.70525	458	258	202	141	4.6711	3.84182	1.8748	1.55918	9.3287	7.61981	3.71666	3.1318
gene-NCU09429	rna-XM_952896.3	protein_coding	3874136	.	.	XP_957989.1	flavin-containing monooxygenase	2.35834	7512.7	0.152266	8.12901	4.32813e-16	3.75566e-14	13.365	12.1277	12.4287	12.5122	13.065	13.1088	5123	3472	12772	9816	26.2405	26.0088	59.6314	54.5585	52.4052	51.5855	118.215	109.588
gene-NCU09441	rna-XM_011396995.1	protein_coding	23568513	.	.	XP_011395297.1	hypothetical protein	2.23477	102.35	0.38023	3.05112	0.00227993	0.0134103	7.14539	5.98022	6.47033	6.41858	6.86121	6.75331	84	42	193	116	0.274674	0.201116	0.580576	0.413911	0.548553	0.39889	1.15095	0.831392
gene-NCU09498	rna-XM_953334.2	protein_coding	3874574	.	.	XP_958427.2	hypothetical protein	-2.90515	23.7874	0.756066	-2.03502	0.0418484	0.135476	3.62062	5.14056	4.61001	4.63084	4.36317	4.45679	41	27	10	15	0.301518	0.292382	0.06527	0.115178	0.602164	0.579906	0.129393	0.23135
gene-NCU09521	rna-XM_953423.2	protein_coding	3874663	.	.	XP_958516.1	ribosome biogenesis protein	-2.68246	3733.97	0.208597	-6.82442	8.82838e-12	3.75295e-10	10.9859	12.4094	11.9216	12.2267	11.2894	11.4682	5398	4714	2162	2100	25.8809	33.0584	9.44935	10.9214	51.687	65.5676	18.7326	21.9371
gene-NCU09522	rna-XM_953424.2	protein_coding	3874664	.	.	XP_958517.2	hypothetical protein	-3.19689	4574.89	0.157646	-10.6357	2.03364e-26	6.11327e-24	11.0903	12.7668	12.3502	12.4521	11.5488	11.6064	7996	5397	2585	2068	69.5362	68.6467	20.4848	19.5054	138.871	136.153	40.6096	39.179
gene-NCU09533	rna-XM_952825.2	protein_coding	3874065	.	.	XP_957918.1	NAD binding Rossmann fold oxidoreductase	2.9752	1187.93	0.176474	8.91339	4.94954e-19	5.78615e-17	10.7964	9.22259	9.71232	9.68376	10.4779	10.4077	752	423	2312	1539	5.32758	4.38062	14.9373	11.8371	10.6398	8.68846	29.6121	23.7762
gene-NCU09535	rna-XM_952827.2	protein_coding	3874067	.	.	XP_957920.2	hypothetical protein	2.07424	2178.65	0.159191	6.61205	3.79046e-11	1.4243e-09	11.5213	10.4695	10.7414	10.7858	11.2736	11.2824	1677	1068	3638	2677	9.1568	8.52439	18.1063	15.8603	18.2871	16.9071	35.8945	31.8573
gene-NCU09537	rna-XM_953663.2	protein_coding	3874903	.	.	XP_958756.1	rho-GTPase-activating protein 8	-2.01733	10426.7	0.147905	-6.84526	7.63379e-12	3.27825e-10	12.7547	13.7672	13.4928	13.5769	13.0188	13.0402	16155	10702	8465	6358	47.5586	46.0832	22.7144	20.309	94.9797	91.4006	45.0297	40.7933
gene-NCU09567	rna-XM_954399.3	protein_coding	3875639	.	.	XP_959492.2	myo-inositol-1(or 4)-monophosphatase	-2.20624	9059.81	0.171428	-6.65927	2.75185e-11	1.05283e-09	12.4643	13.606	13.2329	13.446	12.7429	12.8067	13213	10305	6689	5368	71.5987	81.681	33.0392	31.5611	142.99	162.005	65.4979	63.3945
gene-NCU09617	rna-XM_958288.3	protein_coding	3879537	.	.	XP_963381.3	hypothetical protein	-2.1899	3721.08	0.186019	-6.0793	1.2071e-09	3.62863e-08	11.1879	12.3189	12.1485	11.9578	11.574	11.4153	7014	3271	3265	1850	67.9892	46.3763	28.8441	19.4508	135.782	91.9821	57.1814	39.0695
gene-NCU09639	rna-XM_953077.1	protein_coding	3874317	.	.	XP_958170.1	hypothetical protein	-5.25247	53.8142	0.566833	-4.2217	2.4247e-05	0.000278048	4.13108	6.49356	5.82327	5.87492	5.25486	5.41606	103	70	12	23	0.697076	0.69725	0.070459	0.166728	1.39214	1.38292	0.139681	0.334894
gene-NCU09640	rna-XM_953078.3	protein_coding	3874318	.	.	XP_958171.3	MFS toxin efflux pump	-2.00407	85.7088	0.410081	-2.4457	0.014457	0.059858	5.84129	6.83396	6.58255	6.46603	6.18717	6.27387	155	74	63	58	1.14662	0.802889	0.423634	0.460887	2.28992	1.59244	0.839824	0.92575
gene-NCU09663	rna-XM_953636.2	protein_coding	3874867	.	.	XP_958729.1	Axe2	-2.04676	39428.5	0.152657	-6.76905	1.29632e-11	5.3486e-10	14.6597	15.693	15.4896	15.4247	14.99	14.8847	67544	36997	34804	21556	564.623	452.351	265.182	195.513	1127.61	897.186	525.703	392.713
gene-NCU09691	rna-XM_955545.3	protein_coding	3876786	.	.	XP_960638.1	hypothetical protein	-2.25997	57.0534	0.50303	-2.33843	0.0193647	0.0748018	5.13104	6.30495	5.84677	5.98331	5.57565	5.68726	81	67	35	38	0.833668	0.997345	0.328799	0.418258	1.66492	1.97812	0.651819	0.840125
gene-NCU09760	rna-XM_011395347.1,rna-XM_011395348.1	protein_coding	3874347	.	.	XP_011393650.1; XP_011393649.1	uncharacterized protein, hypothetical protein	-2.31883	21384.2	0.170673	-7.1095	1.1646e-12	5.76614e-11	13.6536	14.867	14.6795	14.4978	14.0441	13.9218	40756	19289	17565	10561	116.347	80.5803	45.7272	32.7511	232.358	159.822	90.6509	65.7846
gene-NCU09767	rna-XM_953258.2	protein_coding	3874498	.	.	XP_958351.2	membrane transporter	2.40236	2643.03	0.166362	7.60059	2.94789e-14	1.8656e-12	11.8654	10.6027	10.8996	11.0167	11.5702	11.5876	1727	1238	4593	3416	9.45153	9.90962	22.9113	20.282	18.8757	19.6546	45.42	40.739
gene-NCU09832	rna-XM_953438.3	protein_coding	3874669	.	.	XP_958531.3	hypothetical protein	-2.30582	2767.41	0.157077	-7.67319	1.67775e-14	1.08628e-12	10.7092	11.9146	11.6647	11.6155	11.071	11.0255	4874	2725	2161	1460	25.0913	20.517	10.1395	8.15384	50.11	40.6931	20.1009	16.378
gene-NCU09873	rna-XM_955062.3	protein_coding	3876302	acu-6	con-3,pck-1	XP_960155.2	phosphoenolpyruvate carboxykinase	-4.91183	5025.19	0.198122	-11.5901	4.62496e-31	1.94642e-28	10.7318	13.0275	12.4051	12.6774	11.3524	11.5067	8574	7064	1821	1755	42.2886	50.9558	8.18534	9.39041	84.4548	101.065	16.2269	18.8618
gene-NCU09904	rna-XM_952926.2	protein_coding	3874166	.	.	XP_958019.2	glucan 1,3-beta-glucosidase	-3.06197	7489.29	0.146807	-10.9971	3.94516e-28	1.3836e-25	11.8485	13.4629	13.0929	13.131	12.295	12.3312	13499	8419	4456	3437	77.6455	70.8285	23.3587	21.4452	155.066	140.48	46.3069	43.0754
gene-NCU09906	rna-XM_953212.3	protein_coding	3874453	.	.	XP_958305.1	hypothetical protein	-2.15302	20930.9	0.148127	-7.46899	8.08149e-14	4.79028e-12	13.6966	14.803	14.6009	14.5017	14.0136	13.983	37201	19514	16920	11737	110.515	84.7909	45.8156	37.8313	220.711	168.173	90.8261	75.989
gene-NCU09909	rna-XM_953215.2	protein_coding	3874456	.	.	XP_958308.1	urea active transporter	2.4835	943.058	0.185324	7.08152	1.42586e-12	6.89739e-11	10.3932	9.08032	9.46748	9.47567	10.0377	10.1369	660	396	1565	1297	2.96421	2.60266	6.41005	6.3227	5.91984	5.16207	12.7075	12.6999
gene-NCU09933	rna-XM_952797.3	protein_coding	3874037	.	.	XP_957890.3	ion channel protein	2.12672	352.864	0.239831	4.53915	5.6482e-06	7.45155e-05	8.90898	7.814	8.21591	8.11155	8.63091	8.63501	304	147	596	437	3.266	2.30448	5.83898	5.0971	6.52256	4.57067	11.5754	10.2382
gene-NCU09964	rna-XM_953378.1	protein_coding	3874609	.	.	XP_958471.1	hypothetical protein	-2.42323	253.346	0.268278	-4.75972	1.9386e-06	2.86266e-05	7.20943	8.48661	8.21355	8.09839	7.67569	7.60821	475	240	198	124	8.79929	6.50678	3.34546	2.49547	17.5731	12.9054	6.63213	5.01246
gene-NCU10031	rna-XM_952931.3	protein_coding	3874171	.	.	XP_958024.2	monooxygenase	-2.55512	652.277	0.207886	-6.51024	7.50297e-11	2.68734e-09	8.52117	9.87216	9.52819	9.57508	8.8668	8.9959	1110	705	406	370	11.2709	10.4624	3.75509	4.06983	22.5091	20.7509	7.4442	8.17476
gene-NCU10344	rna-XM_001728106.1	protein_coding	5847308	.	.	XP_001728158.1	cytochrome P450 98A3	2.48942	138.314	0.338876	3.88287	0.000103233	0.000987398	7.62128	6.3171	6.75884	6.86245	7.30622	7.21926	86	65	262	166	0.570771	0.627143	1.58913	1.19371	1.13989	1.24387	3.15034	2.39772
gene-NCU10501	rna-XM_001728004.1	protein_coding	5847138	.	.	XP_001728056.1	hypothetical protein	-2.03992	90.3557	0.407176	-2.52597	0.011538	0.050163	5.89213	6.9227	6.66964	6.54232	6.35149	6.24079	166	78	86	45	1.90807	1.30019	0.898935	0.561331	3.81062	2.57878	1.78207	1.1275
gene-NCU10809	rna-XM_001727934.2	protein_coding	5847015	.	.	XP_001727986.2	hypothetical protein	-2.85499	15066.9	0.193227	-7.83268	4.77565e-15	3.43561e-13	12.9323	14.4459	14.2364	13.9648	13.4327	13.2697	31877	13550	11008	6149	133.743	83.151	42.0932	27.9911	267.1	164.92	83.4467	56.2236
gene-NCU10852	rna-XM_011395011.1,rna-XM_011395012.1	protein_coding	5847363	.	.	XP_011393313.1; XP_011393314.1	exochitinase, variant	-3.394	22202.9	0.142962	-12.3319	6.10281e-35	3.42449e-32	13.3029	15.0659	14.6602	14.7173	13.8219	13.8063	40537	25856	12747	9029	189.063	175.63	53.2128	45.0975	377.58	348.341	105.491	90.5841
gene-NCU10883	rna-XM_011396726.1,rna-XM_011396727.1	protein_coding	23568546	.	.	XP_011395029.1; XP_011395028.1	uncharacterized protein, hypothetical protein	-2.15764	41542.9	0.163733	-6.77598	1.23565e-11	5.12338e-10	14.6835	15.7929	15.6226	15.4512	15.0282	14.9373	77035	36884	35045	22161	244.976	171.536	101.58	76.4552	489.243	340.221	201.376	153.57
gene-NCU11067	rna-XM_001728220.2	protein_coding	5847509	.	.	XP_001728272.2	hypothetical protein	2.53813	87.483	0.455052	2.95299	0.00314711	0.017424	6.97678	5.61499	6.26466	6.08916	6.69878	6.43928	78	25	194	87	1.42042	0.666968	3.24439	1.72548	2.83673	1.32285	6.43177	3.46585
gene-NCU11216	rna-XM_001728387.2	protein_coding	5847785	.	.	XP_001728439.2	hypothetical protein	-4.62697	94.1921	0.468072	-4.72164	2.33945e-06	3.39503e-05	5.06544	7.27519	6.89066	6.43234	6.083	6.00624	260	71	49	25	1.2666	0.50499	0.215771	0.131445	2.52953	1.00159	0.427751	0.264024
gene-NCU11278	rna-XM_001728258.2	protein_coding	5847571	.	.	XP_001728310.2	hypothetical protein	2.0643	258.083	0.270459	3.8662	0.000110544	0.00105254	8.44275	7.39414	7.77751	7.70566	8.23847	8.09194	222	113	480	281	1.81928	1.35716	3.59174	2.50187	3.63329	2.69177	7.12036	5.02533
gene-NCU11293	rna-XM_001728217.2	protein_coding	5847504	.	.	XP_001728269.2	hypothetical protein	3.54629	31.8131	0.752894	2.42572	0.0152779	0.062576	5.62195	3.84594	4.6723	4.80805	5.20579	4.8481	10	15	91	23	0.315112	0.728111	2.89554	0.870377	0.629313	1.44413	5.74019	1.74826
gene-NCU11295	rna-XM_001728482.2	protein_coding	5847932	.	.	XP_001728534.2	hypothetical protein	-4.46922	28.8455	0.713208	-3.0286	0.00245688	0.0141938	3.40501	5.5576	5.02187	4.80258	4.59826	4.59314	75	24	14	9	0.349	0.160266	0.055928	0.044267	0.69699	0.31787	0.110874	0.088917
gene-NCU11309	rna-XM_001728167.2	protein_coding	5847403	.	.	XP_001728219.1	integral membrane protein	-2.5008	39.9542	0.575509	-2.29777	0.0215747	0.0810254	4.51045	5.83583	5.43927	5.36628	5.16561	5.12031	76	38	32	18	0.582662	0.419673	0.223326	0.149219	1.16364	0.832373	0.442727	0.299726
gene-NCU11324	rna-XM_011395019.1,rna-XM_011395020.1,rna-XM_011395021.1	protein_coding	5847356	.	.	XP_011393321.1; XP_011393323.1; XP_011393322.1	PX domain-containing protein, variant 1, PX domain-containing protein, variant 2	-2.45887	23364.6	0.191201	-6.78864	1.13194e-11	4.74007e-10	13.7217	15.0197	14.8377	14.6007	14.1656	13.9766	46667	20635	19301	10427	130.514	84.4942	48.7378	31.2721	260.651	167.585	96.6192	62.8141
gene-NCU11331	rna-XM_001728127.2	protein_coding	5847347	.	.	XP_001728179.1	hypothetical protein	-2.27557	51.8563	0.502288	-2.36165	0.0181936	0.0714918	4.98542	6.17062	5.79469	5.77961	5.50914	5.52029	89	52	39	29	0.605916	0.515234	0.238333	0.211456	1.21008	1.02191	0.472477	0.424736
gene-NCU11338	rna-XM_001728126.2	protein_coding	5847343	.	.	XP_001728178.2	hypothetical protein	-2.1142	20406	0.145598	-7.41848	1.18471e-13	6.51746e-12	13.6778	14.758	14.4746	14.5502	13.9559	13.9879	32298	21152	15918	12154	245.674	235.334	110.36	100.305	490.638	466.757	218.78	201.475
gene-NCU11383	rna-XM_001728019.2	protein_coding	5847159	.	.	XP_001728071.2	hypothetical protein	2.79891	368.928	0.254767	5.82833	5.59848e-09	1.47719e-07	9.08428	7.60773	8.00822	8.17077	8.6509	8.79245	202	164	609	540	1.18804	1.40702	3.26751	3.44356	2.37265	2.79066	6.4776	6.91683
gene-NCU11411	rna-XM_001728471.2	protein_coding	5847916	.	.	XP_001728523.2	hypothetical protein	2.01909	380.074	0.249166	4.06841	4.73354e-05	0.000503694	8.98815	7.9792	8.21699	8.35985	8.64515	8.80639	270	207	559	513	1.85489	2.07524	3.50228	3.82639	3.70442	4.11599	6.94302	7.68579
gene-NCU11415	rna-XM_001727946.2	protein_coding	5847041	.	.	XP_001727998.2	1-phosphatidylinositol-4,5-bisphosphate phosphodiesterase gamma 2	-2.40563	747.004	0.191954	-6.59748	4.18219e-11	1.55759e-09	8.778	10.0431	9.78417	9.70274	9.15334	9.16285	1360	728	543	400	6.94513	5.43562	2.52672	2.21539	13.8702	10.7809	5.00905	4.44989
gene-NCU11417	rna-XM_001727933.2	protein_coding	5847014	.	.	XP_001727985.1	nucleoside-diphosphate-sugar epimerase	2.41517	725.225	0.206595	6.15759	7.38601e-10	2.3197e-08	10.0008	8.73438	9.03455	9.18955	9.69445	9.70709	453	351	1264	936	3.97412	4.50895	10.1231	8.9284	7.93675	8.94298	20.0683	17.9338
gene-NCU12025	rna-XM_011397022.1	protein_coding	23568554	.	.	XP_011395324.1	hypothetical protein	3.60639	250.927	0.302273	6.12214	9.23268e-10	2.85704e-08	8.6209	6.75712	7.51405	7.36051	8.27669	8.05528	159	63	565	302	2.22783	1.2839	7.25579	4.61013	4.44921	2.54647	14.3841	9.26002
gene-NCU12107	rna-XM_011396748.1	protein_coding	23568589	.	.	XP_011395050.1	hypothetical protein	2.648	89.0456	0.460776	3.04899	0.00229615	0.0134681	7.01815	5.59905	6.25809	6.10662	6.75524	6.42074	75	26	210	82	0.461957	0.228736	1.18648	0.550659	0.922577	0.453671	2.35211	1.10607
gene-NCU14002	rna-XR_897758.1	ncRNA	23568609	.	.	.	ncrg69	-2.00657	66.7682	0.447003	-2.24771	0.0245945	0.0894993	5.47345	6.47746	6.18021	6.1328	5.89891	5.88502	114	62	57	39	2.63159	2.08977	1.18323	0.974245	5.25558	4.14481	2.34567	1.95689
gene-NCU14016	rna-XR_897800.1	ncRNA	23568623	.	.	.	ncrg72	2.2865	44.3881	0.550109	2.16892	0.0300887	0.105086	5.95073	4.75087	5.31106	5.307	5.50338	5.61207	34	19	66	64	0.579978	0.467886	1.01933	1.1891	1.15828	0.927998	2.02074	2.38845
gene-NCU14022	rna-XR_897771.1	ncRNA	23568629	.	.	.	ncrg76	3.03385	59.0543	0.502608	3.18569	0.00144411	0.00920141	6.47832	4.85543	5.6683	5.57331	6.05886	5.95153	44	16	123	72	0.505364	0.267559	1.30252	0.911759	1.00927	0.530672	2.58215	1.83138
gene-NCU14030	rna-XR_897779.1	ncRNA	23568637	.	.	.	ncrg80	2.9014	142.617	0.331725	4.63261	3.61091e-06	5.04867e-05	7.72762	6.19529	6.7764	6.81171	7.36905	7.27474	87	55	283	178	0.985037	0.909202	2.94129	2.20211	1.96722	1.8033	5.83089	4.42321
gene-NCU14037	rna-XR_897787.1	ncRNA	23568644	.	.	.	ncrg115	-4.53159	131.178	0.434716	-5.0148	5.30874e-07	9.00881e-06	5.56806	7.74763	7.41793	6.86862	6.50893	6.40714	370	93	70	35	3.40376	1.25008	0.580758	0.346451	6.79767	2.47939	1.15131	0.695891
gene-NCU14044	rna-XR_897796.1	ncRNA	23568651	.	.	.	ncrg172	-2.06986	120.025	0.357198	-2.93823	0.0033009	0.0181001	6.28756	7.33926	6.95556	7.09448	6.64431	6.70848	173	133	90	76	3.6034	4.05071	1.71035	1.71108	7.19638	8.03412	3.39065	3.43691
gene-NCU14058	rna-XR_897924.1	ncRNA	23568665	.	.	.	ncrg101	2.12532	61.7443	0.478976	2.27084	0.0231566	0.0854488	6.38694	5.31475	5.72828	5.81546	6.10945	5.97729	42	33	119	65	0.853052	0.987728	2.20768	1.44331	1.70364	1.95904	4.37656	2.89908
gene-NCU14070	rna-XR_897957.1	ncRNA	23568677	.	.	.	ncrg137	2.16685	121.306	0.346637	3.21834	0.00128933	0.00839964	7.37435	6.261	6.67465	6.69932	7.07175	7.04393	92	57	211	147	1.80329	1.61902	3.76764	3.11693	3.60136	3.21114	7.46907	6.26075
gene-NCU14073	rna-XR_897944.1	ncRNA	23568680	.	.	.	ncrg2	4.13163	466.583	0.262853	7.78651	6.88849e-15	4.8723e-13	9.55522	7.49853	8.2805	8.11683	9.21428	8.95018	263	107	1095	566	2.18348	1.29498	8.29379	5.10405	4.36065	2.56844	16.4418	10.2521
gene-NCU14086	rna-XR_897954.1	ncRNA	23568692	.	.	.	ncrg145	-2.02778	380.311	0.30483	-3.34581	0.000820435	0.00577875	7.97246	8.99283	8.8802	8.52924	8.4062	8.12333	777	280	393	169	7.64622	4.02622	3.51761	1.79992	15.2703	7.98555	6.97341	3.61536
gene-NCU14106	rna-XR_897844.1	ncRNA	23568712	.	.	.	ncrg148	2.10089	1950.39	0.22646	4.72933	2.2526e-06	3.29742e-05	11.3685	10.2955	10.7101	10.4464	11.2375	10.9681	1859	725	3861	1980	19.8477	11.3198	37.5776	22.9347	39.638	22.4516	74.4949	46.0672
gene-NCU14112	rna-XR_897853.1	ncRNA	23568718	.	.	.	ncrg150	2.27325	71.4479	0.450615	2.6292	0.00855853	0.0395157	6.63811	5.43606	6.00867	5.89777	6.2891	6.26162	64	25	127	88	1.37366	0.777844	2.48161	2.03817	2.74335	1.54276	4.91961	4.09392
gene-NCU14135	rna-XR_897831.1	ncRNA	23568740	.	.	.	ncrg63	3.11846	27.5289	0.810408	2.0247	0.0428982	0.138117	5.37033	3.77538	4.50306	4.62481	4.98848	4.60774	10	14	81	16	0.223358	0.483648	1.74113	0.41315	0.44607	0.95926	3.45166	0.829865
gene-NCU14145	rna-XR_897997.1	ncRNA	23568750	.	.	.	ncrg126	-5.95956	115.115	0.613237	-4.19936	2.67665e-05	0.00030404	5.03927	7.62459	6.13911	7.27241	6.03211	6.03243	58	253	42	29	0.693846	4.46923	0.457929	0.368869	1.38568	8.8642	0.907812	0.74092
gene-NCU14163	rna-XR_897967.1	ncRNA	23568767	.	.	.	ncrg100	3.18671	182.992	0.318374	5.25189	1.50543e-07	2.89958e-06	8.11988	6.45622	7.02273	7.13541	7.59888	7.78163	94	72	298	287	1.19394	1.3318	3.4697	3.97314	2.38443	2.64147	6.87843	7.98056
gene-NCU14178	rna-XR_897958.1	ncRNA	23568781	.	.	.	ncrg55	2.19573	43.8645	0.557647	2.0348	0.0418711	0.135497	5.91637	4.77258	5.30458	5.29334	5.46212	5.60541	35	19	61	65	0.711439	0.571515	1.14292	1.43965	1.42082	1.13353	2.26575	2.89173
gene-NCU15111	rna-NCU15111	tRNA	23568894	.	.	.	tRNA-Gly	3.10862	50.0176	0.531872	3.07644	0.00209486	0.0124787	6.24519	4.5957	5.42351	5.37795	5.80888	5.70514	34	15	105	61	5.67665	3.6538	16.1871	11.2367	11.3369	7.2469	32.0897	22.5703
gene-NCU15702	rna-XR_898015.1	rRNA	23569287	.	.	.	18S ribosomal RNA	2.13318	1753.04	0.20054	5.45032	5.02784e-08	1.09636e-06	11.2213	10.1274	10.4389	10.4434	10.8073	11.0847	1366	817	2419	2564	9.30159	8.13485	15.0193	18.9485	18.5763	16.1345	29.7747	38.0605
gene-NCU15703	rna-XR_898017.1	rRNA	23569288	.	.	.	28S ribosomal RNA	672.765	728.217	2.18505	4.2992	1.71416e-05	0.000205236	10.5061	1.13059	6.24686	6.34329	6.596	9.21004	2	2	51	2596	0.005282	0.006629	0.171257	10.4016	0.010548	0.013148	0.339505	20.8929
gene-NCU15734	rna-XR_898044.1	rRNA	23569307	.	.	.	28S ribosomal RNA	224.491	655.788	2.41512	3.234	0.00122068	0.00803946	10.3506	2.56064	6.16489	6.34444	6.46391	9.0912	1	8	40	2335	0.001518	0.037496	0.130093	9.24549	0.003032	0.074369	0.2579	18.5707
gene-NCU15743	rna-XR_898054.1	rRNA	23569315	.	.	.	28S ribosomal RNA	192.539	498.131	2.69738	2.81347	0.004901	0.025145	9.95281	2.38219	5.8646	6.04197	8.65453	5.96716	1	7	2461	5	0.001515	0.035274	8.1702	0.018584	0.003025	0.069961	16.1968	0.037327
gene-NCU15832	rna-XM_011395708.1	protein_coding	23569380	.	.	XP_011394010.1	hypothetical protein	-2.01402	4386.44	0.164256	-6.14945	7.77525e-10	2.42386e-08	11.5073	12.5171	12.3553	12.2065	11.8117	11.7526	7862	3863	3790	2515	28.5692	20.5289	12.551	9.91493	57.0558	40.7166	24.8815	19.9154
gene-NCU15833	rna-XM_011395709.1	protein_coding	23569381	.	.	XP_011394011.1	hypothetical protein	-3.51802	517.437	0.224805	-8.07262	6.88046e-16	5.67773e-14	7.83809	9.65473	9.30424	9.16745	8.4832	8.38534	1073	536	314	186	9.11444	6.65469	2.42948	1.71151	18.2025	13.1988	4.81626	3.43779
gene-NCU16318	rna-XM_011395030.1	protein_coding	23569393	.	.	XP_011393332.1	hypothetical protein	-2.26714	1589	0.274048	-4.30902	1.63982e-05	0.000197742	9.9261	11.1067	10.5754	11.0063	10.0485	10.3995	1961	2046	874	1126	15.4013	23.4925	6.252	9.59086	30.758	46.5947	12.3941	19.2645
gene-NCU16327	rna-XM_011395035.1	protein_coding	23569398	.	.	XP_011393337.1	hypothetical protein	2.85702	39.6608	0.658718	2.29918	0.0214949	0.0808773	5.8786	4.35661	5.11487	5.05509	5.55387	5.17323	30	12	108	28	0.581961	0.342713	1.92832	0.584162	1.16224	0.679731	3.82276	1.17336
gene-NCU16363	rna-XM_011395057.1	protein_coding	23569420	.	.	XP_011393359.1	hypothetical protein	2.20231	208.806	0.289816	3.93014	8.4897e-05	0.000831872	8.16368	7.03182	7.38541	7.45821	7.9302	7.78924	149	102	395	232	3.40738	3.41045	8.26211	5.7645	6.8049	6.76424	16.379	11.5787
gene-NCU16380	rna-XM_011395071.1	protein_coding	23569434	.	.	XP_011393373.1	hypothetical protein	-2.03824	102.641	0.408648	-2.51396	0.0119383	0.0515305	6.08485	7.1023	6.76375	6.8105	6.33865	6.57332	160	105	59	80	3.03149	2.91545	1.00874	1.64228	6.05421	5.78246	1.99975	3.29873
gene-NCU16445	rna-XM_011395111.1,rna-XM_011395112.1	protein_coding	23569471	.	.	XP_011393414.1; XP_011393413.1	hypothetical protein, uncharacterized protein	-3.57406	45886.7	0.143321	-12.8213	1.24519e-37	9.52794e-35	14.2923	16.1299	15.7707	15.7082	14.844	14.8113	91131	50259	25670	17663	895.713	722.509	229.96	188.39	1788.84	1433.01	455.88	378.405
gene-NCU16472	rna-XM_011395130.1,rna-XM_011395131.1	protein_coding	23569488	.	.	XP_011393433.1; XP_011393432.1	NACHT domain-containing protein, variant	-2.24442	24125	0.189959	-6.13995	8.25474e-10	2.56384e-08	13.8603	15.0266	14.8829	14.6176	14.2487	14.0934	47666	20272	20733	11852	166.767	103.32	65.8547	44.7913	333.051	204.923	130.552	89.9689
gene-NCU16473	rna-XM_011395132.1	protein_coding	23569489	.	.	XP_011393434.1	hypothetical protein	-2.43475	51.8579	0.521176	-2.46322	0.0137694	0.0576601	4.91997	6.19855	5.73219	5.8279	5.43395	5.53963	79	60	30	33	2.3061	2.55201	0.785874	1.04287	4.60553	5.06161	1.55794	2.09474
gene-NCU16589	rna-XM_011395408.1	protein_coding	23569542	.	.	XP_011393710.1	hypothetical protein	2.11304	1306.81	0.172383	6.26117	3.82095e-10	1.25629e-08	10.7932	9.71278	10.0464	9.99731	10.5635	10.5169	1070	586	2276	1558	16.7753	13.4352	32.5337	26.5193	33.502	26.6473	64.4957	53.2673
gene-NCU16597	rna-XM_011395414.1	protein_coding	23569548	.	.	XP_011393716.1	hypothetical protein	-2.00746	2998.27	0.194392	-5.17188	2.31745e-07	4.20387e-06	10.9614	11.9667	11.8368	11.6099	11.3113	11.1488	5615	2491	2795	1578	21.6592	14.0521	9.82757	6.60186	43.2558	27.8707	19.4824	13.2607
gene-NCU16599	rna-XM_011395415.1	protein_coding	23569549	.	.	XP_011393717.1	C6 zinc finger domain-containing protein	2.02123	56.6245	0.493702	2.05637	0.0397466	0.130479	6.24136	5.23244	5.65944	5.68008	5.98641	5.83828	45	28	110	57	0.321915	0.28728	0.716151	0.442211	0.6429	0.569786	1.41972	0.888236
gene-NCU16623	rna-XM_011395717.1	protein_coding	23569558	.	.	XP_011394019.1	hypothetical protein	2.54573	71.5099	0.48115	2.80178	0.00508215	0.0259251	6.68458	5.32757	5.95558	5.86658	6.40757	6.12204	58	24	164	67	0.640287	0.389865	1.67016	0.802271	1.27872	0.773253	3.31097	1.61146
gene-NCU16634	rna-XM_011395725.1	protein_coding	23569566	.	.	XP_011394027.1	hypothetical protein	-2.15946	3039.49	0.192471	-5.77059	7.89924e-09	2.02707e-07	10.91	12.0206	11.6534	11.8596	11.1255	11.2955	4416	3426	2078	1973	57.4059	65.1531	24.6168	27.8336	114.646	129.224	48.8011	55.9074
gene-NCU16683	rna-XM_011395754.1	protein_coding	23569594	.	.	XP_011394056.1	hypothetical protein	2.1133	2095.58	0.200867	5.37422	7.69166e-08	1.61046e-06	11.4735	10.3961	10.581	10.7927	11.1297	11.3028	1377	1144	3145	2862	12.9219	15.6991	26.8984	29.1356	25.8064	31.1374	53.3241	58.5226
gene-NCU16701	rna-XM_011395763.1	protein_coding	23569603	.	.	XP_011394065.1	hypothetical protein	3.00438	23.7188	0.74447	2.13181	0.0330229	0.113081	5.15151	3.5722	4.42007	4.43862	4.67616	4.59897	14	9	50	28	0.208493	0.202409	0.698048	0.457581	0.416383	0.401454	1.38383	0.919109
gene-NCU16729	rna-XM_011396056.1	protein_coding	23569625	.	.	XP_011394358.1	hypothetical protein	-3.20098	151.631	0.353018	-4.75475	1.98687e-06	2.92881e-05	6.16467	7.85502	7.4373	7.38664	6.91459	6.71686	293	163	114	47	4.23551	3.443	1.4975	0.736123	8.45878	6.8288	2.96869	1.4786
gene-NCU16776	rna-XM_011396082.1	protein_coding	23569650	.	.	XP_011394384.1	hypothetical protein	2.24436	1806.29	0.222818	5.23433	1.65585e-07	3.18203e-06	11.2879	10.1193	10.5547	10.3163	11.1368	10.8687	1623	655	3646	1876	17.1495	10.1102	35.1153	21.5074	34.2493	20.0525	69.6136	43.2004
gene-NCU16998	rna-XM_011396533.1	protein_coding	23569753	.	.	XP_011394835.1	hypothetical protein	2.57833	65.2887	0.4594	2.97439	0.0029357	0.0164294	6.55352	5.19564	5.76951	5.82731	6.14836	6.14339	41	29	117	85	0.345757	0.355925	0.907947	0.787417	0.690513	0.705935	1.79994	1.58163
gene-NCU17044	rna-XM_011396556.1	protein_coding	23569775	.	.	XP_011394858.1	hypothetical protein	-2.28729	111.389	0.394123	-3.02859	0.00245697	0.0141938	6.08264	7.27617	7.04184	6.79573	6.60238	6.46932	230	89	100	50	3.04184	1.71411	1.20018	0.715286	6.07488	3.39975	2.37927	1.43674
gene-NCU17136	rna-XM_011396801.1	protein_coding	23569813	.	.	XP_011395103.1	hypothetical protein	-2.19935	1502.91	0.174889	-6.50172	7.94061e-11	2.82009e-09	9.8766	11.0125	10.812	10.6794	10.1964	10.203	2746	1376	1165	855	23.011	16.8694	8.89797	7.77096	45.9555	33.4586	17.6396	15.609
gene-NCU17185	rna-XM_011397054.1	protein_coding	23569831	.	.	XP_011395356.1	hypothetical protein	2.13867	114.55	0.395627	2.77209	0.00556982	0.0280222	7.27917	6.20503	6.47393	6.71755	7.00319	6.91448	63	70	208	130	0.919176	1.49504	2.76504	2.05822	1.83569	2.96524	5.48148	4.1342
gene-NCU17186	rna-XM_011397055.1	protein_coding	23569832	.	.	XP_011395357.1	hypothetical protein	2.51161	55.6902	0.57659	2.30426	0.0212081	0.0801925	6.32692	4.95898	5.67454	5.45882	5.75774	6.00711	56	12	72	93	0.458171	0.13277	0.535277	0.81886	0.915017	0.263335	1.06115	1.64478
gene-NCU17267	rna-XM_011397085.1	protein_coding	23569861	.	.	XP_011395387.1	hypothetical protein	2.6565	3310.48	0.155135	9.08581	1.02926e-19	1.27402e-17	12.2317	10.8229	11.2035	11.2479	11.9439	11.8913	2140	1366	6185	4211	22.9539	21.4241	60.4735	49.0136	45.8415	42.4923	119.884	98.45
gene-NCU17268	rna-XM_011397086.1	protein_coding	23569862	.	.	XP_011395388.1	hypothetical protein	3.63944	2539	0.181034	10.2949	7.43238e-25	1.78738e-22	11.9597	10.0964	10.6559	10.6518	11.6645	11.4363	1348	793	5650	3104	14.625	12.577	55.8807	36.5441	29.2077	24.945	110.78	73.4034
gene-NCU17269	rna-XM_011397087.1	protein_coding	23569863	.	.	XP_011395389.1	oligopeptide transporter OPT	2.93333	785.688	0.189129	8.20889	2.2325e-16	1.978e-14	10.1949	8.64109	9.13576	9.11084	9.85349	9.82735	502	283	1483	1044	2.53483	2.08794	6.83667	5.72832	5.06232	4.14119	13.5532	11.5061
gene-NCU17270	rna-XM_011397088.1	protein_coding	23569864	.	.	XP_011395390.1	hypothetical protein	2.73286	1753.6	0.194344	7.46313	8.44913e-14	4.93864e-12	11.3266	9.87474	10.3491	10.2396	11.1027	10.8804	1257	620	3645	2000	17.6209	12.7199	46.5984	30.4347	35.1909	25.2284	92.378	61.132
gene-NCU17271	rna-XM_011397089.1	protein_coding	23569865	.	.	XP_011395391.1	hypothetical protein	2.59297	1826.69	0.163126	8.42664	3.55746e-17	3.36439e-15	11.3646	9.98935	10.4044	10.373	11.0717	11.0368	1279	720	3355	2335	6.82999	5.62086	16.3289	13.5247	13.6402	11.1483	32.3708	27.1661
gene-NCU17282	rna-XM_011397098.1	protein_coding	23569872	.	.	XP_011395400.1	hypothetical protein	-3.28265	51.8798	0.54046	-3.17296	0.00150893	0.00956375	4.60277	6.31218	5.91789	5.66033	5.42782	5.3982	124	42	33	20	1.737	0.850875	0.41388	0.295856	3.46899	1.68761	0.820488	0.594264
gene-NCU17283	rna-XM_011397099.1	protein_coding	23569873	.	.	XP_011395401.1	hypothetical protein	-2.16752	61.1577	0.5014	-2.22586	0.0260236	0.0936873	5.27072	6.38733	6.12831	5.91532	5.80478	5.68144	126	47	59	27	3.19922	1.75596	1.36446	0.730213	6.38919	3.48275	2.70495	1.46672

## Sheet: Table S3
Supplementary Table S3. Analysis for Gene Ontology (GO) and protein domains using DAVID. p values less than 0.05 are indicated in red color.
Category	Term	Count	%	p value	Genes	List Total	Pop Hits	Pop Total	Fold Enrichment	Bonferroni	Benjamini	FDR
INTERPRO	IPR015880:Zinc finger, C2H2-like	12	2.83019	6.27828e-05	3872689, 3872429, 3880076, 3874045, 3874197, 3880836, 3871938, 3876545, 3881896, 3872155, 3879146, 3871931	274	65	6574	4.42942	0.0245562	0.0245562	0.0874062
SMART	SM00355:ZnF_C2H2	12	2.83019	6.59746e-05	3872689, 3872429, 3880076, 3874045, 3874197, 3880836, 3871938, 3876545, 3881896, 3872155, 3879146, 3871931	91	65	2094	4.24818	0.00381934	0.00381934	0.065621
GOTERM_CC_DIRECT	GO:0016021~integral component of membrane	85	20.0472	0.000100496	3880435, 3880724, 3874453, 3878347, 3880436, 23569872, 3875230, 3872800, 3879434, 3879974, 3880822, 3875646, 3880622, 23568360, 3874498, 3879418, 3874318, 3881143, 3881364, 3873745, 3876989, 3876451, 3881212, 3880486, 3880946, 3872789, 3875121, 3879850, 3873679, 3879965, 3877859, 3875192, 23569393, 3874179, 3880515, 3880516, 3874037, 3873880, 3875325, 3879918, 3872134, 3878769, 3876133, 5847403, …	178	1523	4489	1.4075	0.00531241	0.00531241	0.098006
INTERPRO	IPR007087:Zinc finger, C2H2	12	2.83019	0.000471476	3872689, 3872429, 3880076, 3874197, 3875807, 3880836, 3871938, 3876545, 3881896, 3872155, 3879146, 3871931	274	81	6574	3.55447	0.170348	0.0891475	0.654659
INTERPRO	IPR007568:RTA-like protein	4	0.943396	0.00129045	3876989, 3878347, 3876348, 3875938	274	6	6574	15.9951	0.400313	0.156714	1.78237
INTERPRO	IPR021765:Protein of unknown function DUF3328	4	0.943396	0.00218911	23569864, 23569861, 3875874, 3875879	274	7	6574	13.7101	0.580141	0.195037	3.00615
INTERPRO	IPR013087:Zinc finger C2H2-type/integrase DNA-binding domain	8	1.88679	0.00262621	3872689, 3872429, 3880076, 3871938, 3876545, 3881896, 3879146, 3871931	274	46	6574	4.17264	0.647021	0.188012	3.59624
INTERPRO	IPR020846:Major facilitator superfamily domain	16	3.77358	0.00505866	3872127, 3875729, 3873589, 3879730, 3881212, 3879434, 3878995, 3875646, 3875121, 3876283, 3872996, 3874498, 3876320, 3874945, 3874318, 3880507	274	172	6574	2.23188	0.865785	0.284461	6.81972
GOTERM_BP_DIRECT	GO:0006950~response to stress	4	0.943396	0.00590485	3876989, 3878347, 3876348, 3875938	127	12	3887	10.2021	0.576305	0.576305	6.78931
GOTERM_CC_DIRECT	GO:0005887~integral component of plasma membrane	12	2.83019	0.00678644	23569863, 3872127, 3873643, 3874456, 3877931, 3875729, 3876461, 23569865, 3876320, 3881985, 3876283, 3880507	178	119	4489	2.5431	0.302956	0.165109	6.42787
GOTERM_MF_DIRECT	GO:0004435~phosphatidylinositol phospholipase C activity	3	0.707547	0.00958513	3880394, 5847041, 3879219	191	4	4613	18.1139	0.781672	0.781672	10.9567
INTERPRO	IPR001711:Phospholipase C, phosphatidylinositol-specific, Y domain	3	0.707547	0.00975257	3880394, 5847041, 3879219	274	4	6574	17.9945	0.979369	0.425598	12.7591
INTERPRO	IPR001192:Phosphoinositide phospholipase C	3	0.707547	0.00975257	3880394, 5847041, 3879219	274	4	6574	17.9945	0.979369	0.425598	12.7591
SMART	SM00149:PLCYc	3	0.707547	0.0103603	3880394, 5847041, 3879219	91	4	2094	17.2582	0.453397	0.260674	9.84285
GOTERM_MF_DIRECT	GO:0046872~metal ion binding	21	4.95283	0.0104484	3880751, 3877384, 3876518, 3874197, 3874171, 3875807, 3871961, 3877562, 3880836, 3871938, 3872155, 3871931, 5847785, 3872493, 3880076, 3872429, 3872471, 3875875, 3873602, 3881896, 3879146	191	280	4613	1.81139	0.809773	0.56385	11.8874
SMART	SM00326:SH3	5	1.17925	0.0128823	3873753, 3881692, 3877004, 3876538, 3875343	91	22	2094	5.22977	0.52859	0.221725	12.1029
GOTERM_MF_DIRECT	GO:0004497~monooxygenase activity	8	1.88679	0.0141347	3874136, 23568483, 3879420, 3873562, 3874171, 3877294, 3879731, 3876291	191	63	4613	3.0669	0.894519	0.527511	15.762
GOTERM_BP_DIRECT	GO:0005975~carbohydrate metabolic process	10	2.35849	0.0141967	3872093, 3874774, 3881212, 3872801, 3874724, 3877943, 5847363, 3874179, 3878262, 3874166	127	119	3887	2.57196	0.874226	0.645354	15.612
INTERPRO	IPR000909:Phospholipase C, phosphatidylinositol-specific , X domain	3	0.707547	0.0158105	3880394, 5847041, 3879219	274	5	6574	14.3956	0.998184	0.545644	19.9055
INTERPRO	IPR001452:Src homology-3 domain	5	1.17925	0.0160332	3873753, 3881692, 3877004, 3876538, 3875343	274	24	6574	4.99848	0.998339	0.508935	20.1575
SMART	SM00148:PLCXc	3	0.707547	0.0167861	3880394, 5847041, 3879219	91	5	2094	13.8066	0.625386	0.217659	15.5008
INTERPRO	IPR021858:Protein of unknown function DUF3468	4	0.943396	0.0265514	3875880, 3878456, 23569549, 3876066	274	16	6574	5.99818	0.999976	0.655495	31.2571
GOTERM_BP_DIRECT	GO:0044550~secondary metabolite biosynthetic process	5	1.17925	0.027821	23568483, 3873562, 3877294, 3876291, 5847308	127	36	3887	4.25087	0.983281	0.744298	28.4634
GOTERM_BP_DIRECT	GO:0046323~glucose import	5	1.17925	0.027821	3872127, 3875729, 3876320, 3876283, 3880507	127	36	3887	4.25087	0.983281	0.744298	28.4634
GOTERM_BP_DIRECT	GO:0035428~hexose transmembrane transport	5	1.17925	0.027821	3872127, 3875729, 3876320, 3876283, 3880507	127	36	3887	4.25087	0.983281	0.744298	28.4634
INTERPRO	IPR005828:General substrate transporter	6	1.41509	0.0288501	3872127, 3875729, 3878995, 3876320, 3876283, 3880507	274	42	6574	3.42753	0.999991	0.651418	33.4838
INTERPRO	IPR001138:Zn(2)-C6 fungal-type DNA-binding domain	11	2.59434	0.029837	5847138, 3875880, 3873708, 3881648, 3872543, 3881695, 3878456, 3877604, 3873851, 23569549, 3876066	274	122	6574	2.16328	0.999994	0.631976	34.419
GOTERM_CC_DIRECT	GO:0005622~intracellular	10	2.35849	0.0300072	3873063, 3872493, 3872117, 3878180, 3880394, 3873926, 5847041, 3874903, 3876111, 3879219	178	111	4489	2.27199	0.801056	0.416227	25.714
INTERPRO	IPR001173:Glycosyl transferase, family 2	3	0.707547	0.0314231	3874453, 3876994, 3881489	274	7	6574	10.2826	0.999997	0.621886	35.8967
GOTERM_CC_DIRECT	GO:0000324~fungal-type vacuole	4	0.943396	0.0317916	3876989, 3878347, 3876348, 3875938	178	18	4489	5.60424	0.819553	0.34824	27.0366
GOTERM_MF_DIRECT	GO:0022857~transmembrane transporter activity	5	1.17925	0.0330553	3879730, 3879434, 3875121, 3878995, 3875646	191	30	4613	4.02531	0.995063	0.734928	33.3031
GOTERM_MF_DIRECT	GO:0003824~catalytic activity	9	2.12264	0.0386875	3880435, 3881212, 3872801, 5847014, 3872826, 3872239, 3877943, 3872797, 3878262	191	94	4613	2.31241	0.998038	0.712578	37.8364
GOTERM_BP_DIRECT	GO:0016042~lipid catabolic process	3	0.707547	0.0395662	3880394, 5847041, 3879219	127	10	3887	9.18189	0.997131	0.768557	38.0758
INTERPRO	IPR008253:Marvel	3	0.707547	0.0407657	3878029, 5847403, 3873771	274	8	6574	8.99726	1	0.691875	43.9916
GOTERM_BP_DIRECT	GO:0006820~anion transport	4	0.943396	0.0409698	3879730, 3879434, 3875121, 3875646	127	24	3887	5.10105	0.997679	0.70274	39.1416
INTERPRO	IPR023753:Pyridine nucleotide-disulphide oxidoreductase, FAD/NAD(P)-binding domain	9	2.12264	0.0430394	3876518, 3874136, 23568483, 3877778, 3873562, 3876291, 3877682, 3880036, 3874067	274	95	6574	2.27299	1	0.686958	45.8125
GOTERM_CC_DIRECT	GO:0005618~cell wall	3	0.707547	0.0463741	3874774, 3874179, 3874761	178	9	4489	8.40637	0.91927	0.395485	37.0781
GOTERM_CC_DIRECT	GO:0005886~plasma membrane	10	2.35849	0.0481173	3876989, 3878347, 3878029, 3876121, 3873679, 3877909, 3881352, 3876348, 3875938, 3880515	178	121	4489	2.08422	0.926731	0.353125	38.1913
GOTERM_BP_DIRECT	GO:0006810~transport	5	1.17925	0.0490777	3880622, 3876989, 3878347, 3876348, 3875938	127	43	3887	3.55887	0.999322	0.703628	44.9767
GOTERM_MF_DIRECT	GO:0004871~signal transducer activity	3	0.707547	0.0502026	3880394, 5847041, 3879219	191	9	4613	8.05061	0.999708	0.742398	46.2378
INTERPRO	IPR017853:Glycoside hydrolase, superfamily	8	1.88679	0.0503076	3872093, 3880694, 3881212, 3874724, 3872800, 3877943, 5847363, 3874832	274	81	6574	2.36965	1	0.721274	51.2715
INTERPRO	IPR003663:Sugar/inositol transporter	5	1.17925	0.0507489	3872127, 3875729, 3876320, 3876283, 3880507	274	34	6574	3.52834	1	0.702756	51.5859
INTERPRO	IPR027443:Isopenicillin N synthase-like	3	0.707547	0.0510022	3872493, 3873602, 3881143	274	9	6574	7.99757	1	0.683893	51.7655
GOTERM_MF_DIRECT	GO:0005355~glucose transmembrane transporter activity	5	1.17925	0.0588085	3872127, 3875729, 3876320, 3876283, 3880507	191	36	4613	3.35442	0.999931	0.745391	51.8221
INTERPRO	IPR005829:Sugar transporter, conserved site	5	1.17925	0.060487	3872127, 3875729, 3876320, 3876283, 3880507	274	36	6574	3.33232	1	0.727581	58.0628
GOTERM_MF_DIRECT	GO:0035673~oligopeptide transmembrane transporter activity	3	0.707547	0.0610881	23569863, 3877931, 23569865	191	10	4613	7.24555	0.999953	0.712034	53.2094
GOTERM_BP_DIRECT	GO:0071555~cell wall organization	3	0.707547	0.0643935	3874774, 3874179, 3875944	127	13	3887	7.06299	0.999936	0.748106	54.6235
GOTERM_MF_DIRECT	GO:0005351~sugar:proton symporter activity	5	1.17925	0.0692212	3872127, 3875729, 3876320, 3876283, 3880507	191	38	4613	3.17787	0.999988	0.716154	57.8659
INTERPRO	IPR002654:Glycosyl transferase, family 25	2	0.471698	0.081336	3872802, 3874669	274	2	6574	23.9927	1	0.813576	69.3197
INTERPRO	IPR011701:Major facilitator superfamily	9	2.12264	0.0932783	3873589, 3872996, 3879730, 3879434, 3874498, 3875121, 3875646, 3874945, 3874318	274	112	6574	1.92798	1	0.842209	74.4311
GOTERM_BP_DIRECT	GO:1900027~regulation of ruffle assembly	2	0.471698	0.0941524	3873753, 3876004	127	3	3887	20.4042	0.999999	0.833419	69.0845
GOTERM_MF_DIRECT	GO:0020037~heme binding	7	1.65094	0.0960956	3876518, 3876121, 3879731, 23568504, 3877505, 5847308, 3875306	191	77	4613	2.19562	1	0.797355	70.3979
SMART	SM00066:GAL4	9	2.12264	0.0961435	3875880, 3873708, 3881648, 3872543, 3878456, 3877604, 3873851, 23569549, 3876066	91	110	2094	1.88272	0.997157	0.690433	63.4221

## Sheet: Table S4
Supplementary Table S4. KEGG pathway enrichment analysis. p values less than 0.05 are indicated in red color.
MapID	MapName	Number_of_SigGenes	Genes	Sig.NotIn.KEGG	Genome.In.KEGG	Genome.NotIn.KEGG	PValue	Bonferroni	FDR
01100	Metabolic pathways	40	NCU00709, NCU01271, NCU01348, NCU01853, NCU01904, NCU01905, NCU02084, NCU02137, NCU02295, NCU02369, NCU04343, NCU04460, NCU04554, NCU04720, NCU05133, NCU05340, NCU05499, NCU05624, NCU05762, NCU05977, NCU05985, NCU06137, NCU06266, NCU06523, NCU06726, NCU06970, NCU07774, NCU07853, NCU09025, NCU09035, NCU09041, NCU09184, NCU09209, NCU09533, NCU09567, NCU09873, NCU10031, NCU10852, NCU11278, NCU17186	13	897	9277	3.01992e-30	1.35896e-28	1.35896e-28
00520	Amino sugar and nucleotide sugar metabolism	5	NCU00709, NCU04460, NCU04554, NCU05133, NCU10852	48	48	10126	0.000134396	0.00604782	0.00229981
00052	Galactose metabolism	4	NCU04460, NCU05133, NCU06523, NCU09209	49	20	10154	0.000204428	0.00919926	0.00229981
00040	Pentose and glucuronate interconversions	4	NCU01904, NCU01905, NCU02369, NCU09533	49	20	10154	0.000204428	0.00919926	0.00229981
00330	Arginine and proline metabolism	4	NCU01271, NCU01348, NCU02084, NCU05977	49	24	10150	0.000332823	0.0149771	0.00299541
00910	Nitrogen metabolism	3	NCU04720, NCU06137, NCU07205	50	19	10155	0.00500679	0.225305	0.0371456
04144	Endocytosis	4	NCU02295, NCU04637, NCU04841, NCU06989	49	69	10105	0.0057782	0.260019	0.0371456
00350	Tyrosine metabolism	3	NCU05499, NCU05762, NCU10031	50	26	10148	0.00881005	0.396452	0.0456158
01110	Biosynthesis of secondary metabolites	7	NCU01271, NCU05624, NCU05762, NCU05985, NCU06970, NCU09873, NCU10031	46	351	9823	0.00912315	0.410542	0.0456158
03008	Ribosome biogenesis in eukaryotes	6	NCU03952, NCU09004, NCU15702, NCU15703, NCU15734, NCU15743	47	268	9906	0.0122148	0.549666	0.0549666
00051	Fructose and mannose metabolism	3	NCU01905, NCU09035, NCU09041	50	33	10141	0.0135573	0.61008	0.0554618
01200	Carbon metabolism	3	NCU01853, NCU06970, NCU09873	50	103	10071	0.0995225	1	0.341356
00920	Sulfur metabolism	2	NCU05340, NCU09567	51	21	10153	0.1062	1	0.341356
00790	Folate biosynthesis	2	NCU07774, NCU17186	51	21	10153	0.1062	1	0.341356
00250	Alanine, aspartate and glutamate metabolism	2	NCU05624, NCU06726	51	28	10146	0.137609	1	0.412828
00620	Pyruvate metabolism	2	NCU09873, NCU11278	51	34	10140	0.163668	1	0.460317
03010	Ribosome	4	NCU15702, NCU15703, NCU15734, NCU15743	49	317	9857	0.221848	1	0.573604
00230	Purine metabolism	2	NCU06970, NCU07853	51	50	10124	0.229442	1	0.573604
04011	MAPK signaling pathway - yeast	2	NCU02295, NCU06252	51	59	10115	0.264181	1	0.625692
04113	Meiosis - yeast	1	NCU05627	52	62	10112	1	1	1
00970	Aminoacyl-tRNA biosynthesis	1	NCU09025	52	66	10108	1	1	1
04139	Mitophagy - yeast	1	NCU02295	52	31	10143	1	1	1
00680	Methane metabolism	1	NCU01853	52	21	10153	1	1	1
04070	Phosphatidylinositol signaling system	1	NCU02295	52	22	10152	1	1	1
04136	Autophagy - other	1	NCU08268	52	22	10152	1	1	1
00513	Various types of N-glycan biosynthesis	1	NCU10852	52	27	10147	1	1	1
00310	Lysine degradation	1	NCU06266	52	21	10153	1	1	1
00511	Other glycan degradation	1	NCU10852	52	5	10169	1	1	1
00010	Glycolysis / Gluconeogenesis	1	NCU09873	52	37	10137	1	1	1
00030	Pentose phosphate pathway	1	NCU06970	52	26	10148	1	1	1
00232	Caffeine metabolism	1	NCU07853	52	2	10172	1	1	1
00340	Histidine metabolism	1	NCU04343	52	12	10162	1	1	1
00480	Glutathione metabolism	1	NCU01271	52	24	10150	1	1	1
00531	Glycosaminoglycan degradation	1	NCU10852	52	2	10172	1	1	1
00630	Glyoxylate and dicarboxylate metabolism	1	NCU05977	52	31	10143	1	1	1
04138	Autophagy - yeast	1	NCU08268	52	64	10110	1	1	1
00564	Glycerophospholipid metabolism	1	NCU05985	52	42	10132	1	1	1
00460	Cyanoamino acid metabolism	1	NCU05624	52	16	10158	1	1	1
00562	Inositol phosphate metabolism	1	NCU02295	52	24	10150	1	1	1
00563	Glycosylphosphatidylinositol (GPI)-anchor biosynthesis	1	NCU02137	52	21	10153	1	1	1
00561	Glycerolipid metabolism	1	NCU05985	52	23	10151	1	1	1
00500	Starch and sucrose metabolism	1	NCU06523	52	47	10127	1	1	1
00020	Citrate cycle (TCA cycle)	1	NCU09873	52	26	10148	1	1	1
01230	Biosynthesis of amino acids	1	NCU06970	52	113	10061	1	1	1
00380	Tryptophan metabolism	1	NCU09184	52	28	10146	1	1	1
